# Supplementary material for: Dynamic distribution of muscle-specific calpain in mice has a key role in physical-stress adaptation and is impaired in muscular dystrophy
Source: JCI journal article supplement (doi:10.1172/jci40658), 2010-06-30
Supplement: sd1 [file 1]

# SUPPLEMENTAL DATA

for “Dynamic distribution of muscle-specific calpain in mice has a key role in physical-stress adaptation and is impaired in muscular dystrophy” by Koichi Ojima *et al.*

## Supplemental Table S1

DNA microarray analysis of skeletal muscle cells of WT and p94KI mice

### Increase in p94KI

| Fold change | gene            | product name                                                        | aliases                                                                                | probe Ac.No. |
|-------------|-----------------|---------------------------------------------------------------------|----------------------------------------------------------------------------------------|--------------|
| 5.34        | <i>Ddit4</i>    | DNA-damage-inducible transcript 4                                   | REDD1, RTP801, Dig2, FLJ20500, DKFZp564O2071                                           | AI849939     |
| 3.25        | <i>AA675344</i> | -                                                                   | -                                                                                      | AA675344     |
| 3.06        | <i>Prom1</i>    | prominin-1                                                          | AC133, CD133, MSTP061, PROML1,                                                         | AF039663     |
| 2.18        | <i>Slc30a1</i>  | solute carrier family 30 (Zn transporter), member 1                 | ZNT1, ZnT-1                                                                            | U17132       |
| 2.04        | <i>Hspca</i>    | heat shock 90 kDa protein 1, $\alpha$                               | HSPC1, Hsp89, Hsp90, FLJ31884, LAP2, HSP86, HSP90A                                     | J04633       |
| 2.02        | <i>Kcna5</i>    | potassium voltage-gated channel, shaker-related subfamily, member 5 | HK2, HPCN1, KV1.5, PCN1, Kv1.5                                                         | L22218       |
| 1.89        | <i>Mig-6</i>    | mitogen-inducible gene 6 protein                                    | GENE-33, MIG6, RALT(receptor-associated late transducer)                               | AI853531     |
| 1.78        | <i>Gucy1b3</i>  | guanylate cyclase 1, soluble, $\beta$ 1                             | guanylate cyclase 1 soluble $\beta$ 3, GUCB3, GC-SB3, GUC1B3, GUCSB3, GC-S- $\beta$ -1 | AF020339     |
| 1.70        | <i>Mtss1l</i>   | metastasis suppressor 1-like                                        | insulin receptor tyrosine kinase substrate p53 (IRSp53)-related protein (ABBA-1)       | AI846678     |
| 1.67        | <i>Prkca</i>    | PKC $\alpha$                                                        | PKCA                                                                                   | M25811       |
| 1.64        | <i>Angpt1</i>   | angiopoietin 1                                                      | KIAA0003, ANG-1                                                                        | U83509       |
| 1.64        | <i>Rabep1</i>   | rabaptin, RAB GTPase binding effector protein 1                     | neurocrescin, RAB5EP, RABPT5, rabaptin-5, rabaptin-5 $\alpha$ , rabaptin-4, RABPT5A    | D86066       |
| 1.63        | <i>Mki67ip</i>  | MKI67 (FHA domain) interacting nucleolar phosphoprotein             | Nopp34, NIFK                                                                           | AI852665     |
| 1.60        | <i>Tyms-ps</i>  | thymidylate synthase, pseudogene                                    | -                                                                                      | M30774       |
| 1.56        | <i>Cma1</i>     | chymase 1, mast cell                                                | mast cell protease I, CYH, CYM, MCT1, chymase, heart                                   | M68898       |
| 1.52        | <i>Lrrc23</i>   | leucine rich repeat containing 23                                   | Lrpb7                                                                                  | AV257486     |
| 1.50        | <i>Sox17</i>    | SRY (sex determining region Y)-box 17                               | transcription factor SOX-17                                                            | D49473       |

|      |                      |                                                |                                                                         |          |
|------|----------------------|------------------------------------------------|-------------------------------------------------------------------------|----------|
| 1.50 | <b><i>Dnajb2</i></b> | DnaJ (Hsp40) homologue, subfamily B, member 2  | HSJ1, HSPF3, HSJ-1, DnaJ protein homolog 1, heat shock 40 kDa protein 3 | AI843164 |
| 1.50 | <b><i>Pnpla2</i></b> | patatin-like phospholipase domain containing 2 | TTS-2.2, 1110001C14Rik, transport-secretion protein 2.2                 | AW121217 |

***Decrease in p94KI***

| <b>fold</b> | <b>gene</b>                 | <b>product name</b>                                                      | <b>aliases</b>                                                                                                                                             | <b>probe Ac.No.</b> |
|-------------|-----------------------------|--------------------------------------------------------------------------|------------------------------------------------------------------------------------------------------------------------------------------------------------|---------------------|
| 4.46        | <b><i>Itgb2</i></b>         | Integrin $\beta$ 2                                                       | CD18, MFI7, LFA-1/CR3/p150,95 $\beta$ -subunit, Complement receptor C3 $\beta$ -subunit                                                                    | M31039              |
| 2.87        | <b><i>Alas2</i></b>         | $\delta$ -aminolevulinase, synthase 2 (sideroblastic/hypochromic anemia) | ASB, ANH1, XLSA, hereditary iron-loading anemia                                                                                                            | M15268              |
| 2.75        | <b><i>1500010J02Rik</i></b> | hypothetical protein FLJ22170                                            |                                                                                                                                                            | AW124900            |
| 2.48        | <b><i>Idh3a</i></b>         | isocitrate dehydrogenase 3 (NAD <sup>+</sup> ) alpha                     | isocitric dehydrogenase, EC 1.1.1.41                                                                                                                       | AV095915            |
| 2.31        | <b><i>Cadps</i></b>         | Ca <sup>2+</sup> -dependent secretion activator                          | CAPS, KIAA1121, CAPS1                                                                                                                                      | D86214              |
| 2.30        | <b><i>Hba1</i></b>          | hemoglobin, $\alpha$ 1                                                   | CD31, HBA2                                                                                                                                                 | V00714              |
| 1.68        | <b><i>Hba2</i></b>          | hemoglobin, $\alpha$ 2                                                   |                                                                                                                                                            | AV003378            |
| 2.26        | <b><i>Fap</i></b>           | $\alpha$ fibroblast activation protein                                   | DPPIV, FAPA, SEPRASE, integral membrane serine proteinase, 170-kDa melanoma membrane-bound gelatinase                                                      | Y10007              |
| 2.12        | <b><i>Znf281</i></b>        | zinc finger protein 281                                                  | ZBP-99, ZNP-99, GC-box-binding zinc finger protein 1, GZP1, ZBP99                                                                                          | AI850113            |
| 2.03        | <b><i>Scd</i></b>           | stearoyl-CoA desaturase ( $\delta$ -9-desaturase)                        | FADS5, PRO0998, fatty acid desaturase, acyl-CoA desaturase                                                                                                 | AV327760            |
| 1.93        | <b><i>Evi2a</i></b>         | ectropic viral integration site 2A                                       | EVI2, EVDA                                                                                                                                                 | M34896              |
| 1.91        | <b><i>Tle4</i></b>          | transducin-like enhancer of split 4 (E(spl) homologue, drosophila)       | E(spl), ESG, KIAA1261, Groucho4                                                                                                                            | U61363              |
| 1.77        | <b><i>AI506816</i></b>      | (BC028259, viral LTR?)                                                   | -                                                                                                                                                          | C78850              |
| 1.75, 1.65  | <b><i>Rbbp6</i></b>         | retinoblastoma binding protein 6                                         | MY038, RBQ-1, DKFZp761B2423                                                                                                                                | AI661370, AV330213  |
| 1.71        | <b><i>Cd200</i></b>         | CD200 antigen                                                            | MOX1, MOX2, antigen identified by monoclonal antibody MRC OX-2, MRC, OX-2, OX-2 membrane glycoprotein, My033                                               | AF029215            |
| 1.69        | <b><i>Dsp</i></b>           | desmoplakin                                                              | DPI, DPII, KPPS2, PPKS2, DP, 250/210 kDa paraneoplastic pemphigus antigen                                                                                  | AA600542            |
| 1.67        | <b><i>Clns1a</i></b>        | chloride channel, nucleotide-sensitive, 1A                               | DLCI, ICln, CLNS1B, methylosome subunit pICln, chloride conductance regulatory protein ICln, chloride ion current inducer protein ClCI, reticulocyte pICln | U53455              |

|      |                       |                                                                                        |                                                                                                               |          |
|------|-----------------------|----------------------------------------------------------------------------------------|---------------------------------------------------------------------------------------------------------------|----------|
| 1.67 | <b><i>Tp53bp1</i></b> | tumor protein p53 binding protein, 1                                                   | p202, 53BP1                                                                                                   | AW048394 |
| 1.65 | <b><i>Ppp2r5c</i></b> | protein phosphatase 2, regulatory subunit B (B56), $\gamma$ isoform                    | PP2A, B subunit, B' $\gamma$ , B56 $\gamma$ , PR61 $\gamma$ , R5 $\gamma$ isoform, KIAA0044                   | U59418   |
| 1.64 | <b><i>Igfbp5</i></b>  | insulin-like growth factor binding protein 5                                           | IGFBP-5, IBP-5, IGF-binding protein 5, IBP5                                                                   | L12447   |
| 1.63 | <b><i>Ermp1</i></b>   | endoplasmic reticulum metalloproteinase 1                                              | FLJ23309, KIAA1815                                                                                            | AI851365 |
| 1.62 | <b><i>Crip1</i></b>   | cysteine-rich protein 1 (intestinal)                                                   | CRIP cysteine-rich intestinal protein, CHIP cysteine-rich heart protein, hCRHP                                | M13018   |
| 1.61 | <b><i>Mrc1</i></b>    | mannose receptor, C type 1                                                             | CD206, MMR, macrophage mannose receptor precursor                                                             | Z11974   |
| 1.61 | <b><i>Chp</i></b>     | Ca <sup>2+</sup> -binding protein P22                                                  | SLC9A1BP, Sid470, calcineurin B homologue                                                                     | AB025217 |
| 1.60 | <b><i>Cnn2</i></b>    | calponin 2                                                                             | calponin H2, smooth muscle, neutral calponin                                                                  | Z19543   |
| 1.57 | <b><i>Alg2</i></b>    | asparagine-linked glycosylation 2 homologue (yeast, $\alpha$ -1,3-mannosyltransferase) | CDGLi, FLJ14511, hALPG2, GDP-M an:Man(1)GlcNac(2)-PP-dolichol man nosyltransferase                            | AI834815 |
| 1.54 | <b><i>Cdan1</i></b>   | congenital dyserythropoietic anemia, type 1                                            | CDA-I, CDAI, codanin, UNQ664/PRO1295                                                                          | AA691078 |
| 1.53 | <b><i>Slc11a2</i></b> | solute carrier family 11 (proton-coupled divalent metal ion transporters), member 2    | NRAMP2, DCT1, DMT1, OK/SW-cl.20, natural resistance-associated macrophage protein 2                           | L33415   |
| 1.53 | <b><i>Staf42</i></b>  | SPT3-associated factor 42                                                              | RP1-9E21.4                                                                                                    | AW125318 |
| 1.53 | <b><i>Ints7</i></b>   | integrator complex subunit 7                                                           |                                                                                                               | AW120890 |
| 1.53 | <b><i>Prss23</i></b>  | protease, serine, 23                                                                   | SPUVE, SIG13, UNQ270/PRO307, putative secreted protein ZSIG13                                                 | AW228316 |
| 1.52 | <b><i>Siat8d</i></b>  | sialyltransferase 8D ( $\alpha$ -2,8-polysialyltransferase)                            | PST, PST1, ST8Sia IV, CMP-N-acetylneuraminate-poly- $\alpha$ -2,8-sialyl transferase, polysialyltransferase-1 | X86000   |
| 1.52 | <b><i>Fbxo3</i></b>   | F-box protein 3                                                                        | 1200002G09Rik, 1700026K02Rik, Fba                                                                             | AW046579 |
| 1.50 | <b><i>Cpxm2</i></b>   | carboxypeptidase X (M14 family), member 2                                              | 4632435C11Rik, UNQ676/PRO1310, potential carboxypeptidase-like protein X2                                     | AF017639 |
| 1.50 | <b><i>Rpa3</i></b>    | replication protein A3, 14 kDa                                                         | replication protein A 14 kDa subunit, RP-A, RF-A                                                              | AI848299 |

Gene expression profiles of skeletal muscle from two independent WT and p94KI mice (total of four) were compared using an Affymetrix U74A DNA chip as described previously (1), and genes that showed significantly different expression between WT and p94KI are listed. Note that none of the products of these genes are included in Supplemental Figure S10.

**Supplemental Table S2****Abs used in this study**

| Antigen name                  | Dilution (Blot) | Dilution (Histology) | Company/Reference                             |
|-------------------------------|-----------------|----------------------|-----------------------------------------------|
| p94:IS2C                      | 1:3000          | -                    | (2)                                           |
| p94:pNS                       | -               | 1:300                | (3)                                           |
| connectin/titin N2A           | -               | 1:500                | (4)                                           |
| MARF2/ANKRD2                  | 1:2000          | 1:500                | (5)                                           |
|                               | 1:1000          | 1:500                | Protein Tech Group, Inc.                      |
| laminin $\alpha$ 2            | -               | 1:300                | Alexis Biochemicals                           |
| sarcomeric- $\alpha$ -actinin | -               | 1:1000               | Sigma                                         |
| His-tag                       | 1:1000          | -                    | Novagen                                       |
| M-cadherin                    | -               | 1:500                | Santa Cruz Biotechnology, Inc.,<br>clone#12G4 |
| Dysferlin                     | -               | 1:40                 | Novocastra laboratories Ltd                   |

-: not used in this study

### Supplemental Table S3

#### PCR primers used in this study

| Name/use   | Direction | Sequence                                                                                            |
|------------|-----------|-----------------------------------------------------------------------------------------------------|
| lox1s      | sense     | 5'-cgc gga tcc ata tga taa ctt cgt ata gca tac att ata cga agt tat tcg agc<br>agt gtg gtt ttg ca-3' |
| lox1a      | antisense | 5'-cgc gga tcc ata tga taa ctt cgt ata gca tac att ata cga agt tat gat ccg<br>aac aaa cga ccc aa-3' |
| lox2s-1    | sense     | 5'- cat aca tta tac gaa gtt atc gat gag ctc gag cag tgt ggt t-3'                                    |
| lox2s-2    | sense     | 5'-cgc gga tcc ata tga taa ctt cgt ata gca tac att ata cga a-3'                                     |
| lox2a      | antisense | 5'-atc ctg atc gac aag acc-3'                                                                       |
| 5' probe   | sense     | 5'-ctg caa gaa cat ggt gct ta-3'                                                                    |
|            | antisense | 5'-gag acg ctt cct tgt gcg-3'                                                                       |
| 3' probe   | sense     | 5'-tgg gga ccg tca tga caa tgc-3'                                                                   |
|            | antisense | 5'-tct ggg ggc gct agt cag tct c-3'                                                                 |
| ex.3 probe | sense     | 5'-tcc cga gtc att agc tat gg-3'                                                                    |
|            | antisense | 5'-cca cac gtg gat gta agt tg-3'                                                                    |
| PCR1       | sense     | 5'-aga ccc atc tgt cct tgt tg-3'                                                                    |
|            | antisense | 5'-aaa ggc agt ctg gag tct ag-3'                                                                    |
| PCR2       | sense     | 5'-tcc cga gtc att agc tat gg-3'                                                                    |
|            | antisense | 5'-cca cac gtg gat gta agt tg-3'                                                                    |

## REFERENCES for SUPPLEMENTAL DATA

1. Witt, C.C., Ono, Y., Puschmann, E., McNabb, M., Wu, Y., Gotthardt, M., Witt, S.H., Haak, M., Labeit, D., Gregorio, C.C., et al. Induction and myofibrillar targeting of *CARP*, and suppression of the Nkx2.5 pathway in the MDM mouse with impaired titin-based signaling. *J. Mol. Biol.* 2004;336(1):145-154.
2. Ojima, K., Ono, Y., Doi, N., Yoshioka, K., Kawabata, Y., Labeit, S., and Sorimachi, H. Myogenic stage, sarcomere length, and protease activity modulate localization of muscle-specific calpain. *J. Biol. Chem.* 2007;282(19):14493-14504.
3. Sorimachi, H., Toyama-Sorimachi, N., Saido, T.C., Kawasaki, H., Sugita, H., Miyasaka, M., Arahata, K., Ishiura, S., and Suzuki, K. Muscle-specific calpain, p94, is degraded by autolysis immediately after translation, resulting in disappearance from muscle. *J. Biol. Chem.* 1993;268(14):10593-10605.
4. Trombitas, K., Greaser, M., Labeit, S., Jin, J.P., Kellermayer, M., Helmes, M., and Granzier, H. Titin extensibility in situ: entropic elasticity of permanently folded and permanently unfolded molecular segments. *J. Cell Biol.* 1998;140(4):853-859.
5. Hayashi, C., Ono, Y., Doi, N., Kitamura, F., Tagami, M., Mineki, R., Arai, T., Taguchi, H., Yanagida, M., Hirner, S., et al. Multiple molecular interactions implicate the connectin/titin N2A region as a modulating scaffold for p94/calpain 3 activity in skeletal muscle. *J. Biol. Chem.* 2008;283(21):14801-14814.
6. Thompson, S., Clarke, A.R., Pow, A.M., Hooper, M.L., and Melton, D.W. Germ line transmission and expression of a corrected *HPRT* gene produced by gene targeting in embryonic stem cells. *Cell* 1989;56(2):313-321.
7. Lakso, M., Pichel, J.G., Gorman, J.R., Sauer, B., Okamoto, Y., Lee, E., Alt, F.W., and Westphal, H. Efficient in vivo manipulation of mouse genomic sequences at the zygote stage. *Proc. Natl. Acad. Sci. USA* 1996;93(12):5860-5865.

### Supplemental Figure S1. Generation of p94KI mice.

(A) Targeting scheme for the p94KI construct. A missense mutation [6th T to A in exon 3 of the p94/calpain 3 gene, *Capn3* (agGGGACTGCTGGTTT -> agGGGACAGCTGGTTT)], was introduced into exon 3 by performing PCR on a 1.7-kb *Bst*PI fragment subcloned from 129S mouse genomic DNA. The missense mutation changed Cys129, an amino acid residue in the catalytic center of p94, to Ser, and created a *Pvu*II site. The complete nucleotide sequence of the mutated 1.7-kb *Bst*PI fragment was verified by DNA sequencing.

A neomycin-resistance gene (*neoR*) flanked by loxP sequences was constructed as follows. A DNA fragment was generated by PCR using primers lox1s and lox1a (see Table S3) and pMC1neo polyA<sup>+</sup> vector DNA (Stratagene) as a template. The 3'-part of the fragment was rescued by cutting it with *Rsr*II and *Bam*HI, which resulted in a *neoR*-loxP 3' fragment of 255 bp, and the fragment was cloned into the 3.6-kb pMC1neo polyA<sup>+</sup>/*Rsr*II-*Bam*HI fragment (Plasmid A). The 5'-loxP part was amplified by performing half-nested PCR, first with primers lox2s-1 and lox2a and then with lox2s-2 and lox2a, on pMC1neo polyA<sup>+</sup> plasmid DNA. The amplified PCR fragment was cloned into the TA TOPO cloning vector (Invitrogen), and the 5'-loxP-containing *Spe*I-*Cla*I fragment (*Spe*I-TOPO vector-*Nde*I-loxP-*Cla*I) was used for ligation with the *Xho*I-*Spe*I fragment (*Xho*I-*neoR*-loxP-*Nde*I-*Spe*I) of Plasmid A described above, resulting in loxP-*neoR*-loxP flanked by *Nde*I sites (*Nde*I-loxP-*neoR*-loxP-*Nde*I) in the TOPO vector. The *neoR* cassette was cut by *Nde*I and inserted into the *Nde*I site located 280-bp downstream of the exon 3-intron 3 junction of *Capn3*.

The C129S mutation and *neoR* cassette insertion were then ligated together, and the *Hind*III-*Bgl*II fragment of pMCDT-A(A+T/pau) (Oriental Yeast) was added to the 3'-end of the final targeting vector. The targeting vector was introduced into mouse E14tg2a modified ES cells (6) by electro-transfection (*Capn3*<sup>C129S-*neo*</sup>). Among the 120 ES colonies that survived in G418 selection medium, 6 were positive for the targeting vector as determined by PCR screening (see B). The

recombinant ES cell lines were also characterized by Southern blot analysis (see C). Isolated genomic DNA was digested with *Afl*III or *Stu*I+*Bam*HI, and hybridized with the 5' or 3' probe indicated. Cell lines #32 and #55 were used for blastocyst injection, and both produced germline-transmitted chimeric mice. The F1 heterozygotes (*Capn3*<sup>C129S-neo/+</sup>) were analyzed by Southern blot analysis (see D) to confirm proper recombination, and were crossed with Tg mice expressing the Cre recombinase in germline cells, B6.FVB-TgN(EIIa-Cre)C5379Lmgd (7). Both the #32 and #55 lines produced mice with the C129S mutation without *neoR* (*Capn3*<sup>C129S</sup>), which was confirmed by PCR and Southern blot analyses (see D), and eventually showed apparently identical phenotypes (data not shown). Therefore, the #55 line was used for further experiments. The p94KI mice were backcrossed with C57BL/6 J mice for more than 8 generations. The mouse genotypes were determined by genomic Southern blot and PCR analyses. The PCR primers are listed in Table S3.

The numbers indicate exons. LoxP sites were inserted on both sides of a *neoR* cassette. PCR1 and PCR2 indicate the amplified regions used to detect the allele by homologous recombination. DT-A, diphtheria toxin A fragment.

**(B)** PCR screening of ES cell colonies. Genomic DNA isolated from G418-resistant ES cell lines was subjected to PCR amplification of the targeted region shown in (A) as “PCR1”. Closed and open arrowheads indicate the amplified bands of the WT and mutant samples, respectively. ht, heterozygous; HM, homozygous.

**(C)** Southern blot analysis of F1 mice. Genomic DNA isolated from the tails of mice resulting from crosses between targeted chimeras and WT mice was digested with *Afl*III or *Stu*I+*Bam*HI, and subjected to Southern blot analysis using the 5' and 3' probes indicated in A. Closed and open arrowheads indicate bands corresponding to the WT and mutant alleles, respectively. ht, heterozygous.



(D) Southern blot and PCR analysis of p94KI. Genomic DNA from mice derived from crosses between p94KI and WT mice was digested with *PvuII* and subjected to Southern blot analysis using the ex.3 probe indicated in A (upper). The same genomic DNA was subjected to PCR amplification using the same conditions as in (B) (lower). Closed and open arrowheads indicate bands corresponding to the WT and mutant alleles, respectively. ht, heterozygous; HM, homozygous.

(E) Confirmation of the C129S mutation in p94KI mice. Genomic DNA from the mouse tail was amplified by PCR and digested by *PvuII*, generating fragments of 662 and 108 bp (open arrowheads) for homozygotes (HM), 730 bp (closed arrowheads) for WT mice (WT), and 108, 662, 730, and 770 bp for heterozygotes (ht).

(F) Proteolytic inactivity of p94 in p94KI mice. Equal amounts of protein from skeletal muscle lysates of WT and p94KI mice (15-wk old) were incubated with 10 mM EDTA or 5 mM  $\text{CaCl}_2$  at 30°C for 30 min. Full-length p94 (arrow) and its proteolytic fragments (arrowheads) were detected with an anti-p94 (pIS2C) Ab. -, no treatment; E, +EDTA; C, + $\text{Ca}^{2+}$ .

#### **Supplemental Figure S2. Exercise-induced autolysis and localization change of p94.**

Full-length p94 and its fragments in WT, WT-ex, p94KI, and p94KI-ex mice were analyzed by immunoblotting using an anti-p94 (pIS2C) Ab in the Ppt (A), total (D), and Sup (see Figure 2A) fractions of TA muscle (representative blots are shown). In WT-ex and p94KI-ex mice, the TA muscles were isolated immediately after exercise. Full-length p94 (C, F, G) and one of its proteolytic fragments (B, E, and Figure 2B) indicated in A and D as closed and open arrowheads, respectively, were quantified by normalizing to CBB-stained Mhc (Ppt and total) or actin (Sup). cont, COS-expressed human p94:C129S; \*,  $P < 0.01$  (vs WT).

**Supplemental Figure S3. Frequency distribution of EBD-negative and -positive myofiber CSAs in the Gastrocnemius (GC) of p94KI-ex mice on post-exercise day 1.**

A total of 378 EBD-negative (undamaged) and 110 EBD-positive fiber profiles were traced in two sections from each of three p94KI-ex mice. The average CSAr was  $1,817 \mu\text{m}^2$  and  $1,933 \mu\text{m}^2$  for the EBD-negative and -positive myofibers, respectively, showing no statistically significant difference.

**Supplemental Figure S4. Normal muscle regeneration was observed in exercised p94KI mice.**

Muscle regeneration processes were observed in H&E-stained gastrocnemius muscles from WT-ex (A-C) and p94KI-ex (D-F) mice. Muscles were prepared on the indicated days after exercise. The invading cells and proliferating myogenic cells were observed in p94KI-ex mice (dotted areas in D and E). Small-diameter myofibers with central nuclei are de novo regenerated myofibers (F). WT-ex mice showed no obvious damage (A-C). Bars, 100  $\mu\text{m}$ .

**Supplemental Figure S5. Control experiments for the FRAP experiments in Figure 3C.**

(A and B) FRAP observation of GFP expressed in cultured myotubes. Representative series of micrographs are shown. GFP was exogenously expressed in cultured myotubes from WT (A) or p94KI (B) mice by the transfection of pEGFP empty vector into the myotubes. GFP showed diffuse and uniform signals in the cytosol without striation. Reference images were acquired before photobleaching (Pre). Rectangles indicate the photobleached areas. (C) Relative fluorescence intensities in the areas were calculated by LSM software as the ratio of GFP intensity at each time point to that before photobleaching, and plotted against time. The GFP signal could not be photobleached to 0% because the mobility of GFP in the cytosol was too fast, and was quickly recovered to almost 90% within 30 s.

**Supplemental Figure S6. Statistical tests for the significant difference between the k values for**

**p94WT and p94:C129S in Figure 3C.**

(A) Scatter plots of  $\mathbf{R}$  vs. time and analysis of covariance. Observation time ( $t$ , s) and relative recovery of GFP fluorescence intensity ( $\mathbf{R}_{WT}$  and  $\mathbf{R}_{CS}$  for p94WT (WT) and p94:C129S (CS) experiments, respectively) were well fitted to the equation,  $\mathbf{R} = M(1 - e^{-kt})$ , and we obtained estimated values of  $M$  and  $k$  for both WT and CS ( $M_{WT}$ ,  $k_{WT}$ ,  $M_{CS}$ , and  $k_{CS}$  are estimated to be 0.590, 0.0104, 0.619, and 0.00538, respectively, as shown here and in Figure 3C). First, the following two hypotheses are taken:  $H_0: k_{WT} = k_{CS}$  and  $H_I: k_{WT} \neq k_{CS}$  (both sides)

Under  $H_I$ , the residual sums of squares for WT and CS are calculated using each of 400 data pairs ( $(\mathbf{R}_{WTi}, t_i)$  and  $(\mathbf{R}_{CSi}, t_i)$  [ $i = 1$  to 400]):

$$\Delta WT = \sum_{i=1}^{400} \left( \mathbf{R}_{WTi} - M_{WT}(1 - e^{-k_{WT}t_i}) \right)^2 = 0.562; \Delta CS = \sum_{i=1}^{400} \left( \mathbf{R}_{CSi} - M_{CS}(1 - e^{-k_{CS}t_i}) \right)^2 = 1.590; \Delta 1 = \Delta WT + \Delta CS = 2.152$$

Under  $H_0$ , all 800 data pairs (400 WT and 400 CS) were fitted as described above, and the following equation was obtained:

$\mathbf{R}_T = M_T(1 - e^{-k_T t})$ , where  $M_T$ , and  $k_T$  are estimated to be 0.5859 and 0.00788 by the least squares method.

The residual sums of squares for all 800 data pairs were calculated using two of the 400 data pairs ( $(\mathbf{R}_{WTi}, t_i)$  and  $(\mathbf{R}_{CSi}, t_i)$  [ $i = 1$  to 400]):

$$\Delta 2 = \sum_{i=1}^{400} \left( \mathbf{R}_{WTi} - M_T(1 - e^{-k_T t_i}) \right)^2 + \sum_{i=1}^{400} \left( \mathbf{R}_{CSi} - M_T(1 - e^{-k_T t_i}) \right)^2 = 3.834$$

A statistical value,  $F$  is defined as follows:  $F = \frac{\Delta 2 - \Delta 1}{\Delta 1 / (N - 4)} = \left( \frac{\Delta 2}{\Delta 1} - 1 \right) \times (N - 4) = 578.7$ , where  $N$  = the number of total samples (in our case, 400 + 400 - 56 (inappropriate data) = 744). By analysis of covariance, under  $H_0$ ,  $F$  is known to follow the  $F$  distribution with the degrees of freedom,  $v_1 = 1$  and  $v_2 = N - 4$  [ $F_{1, N-4}$ ]. Since the upper point where  $F_{1, N-4}$  shows 0.001 probability ( $F_{1, N-4}(\alpha = 0.001)$ ) is 10.91, and is less than the calculated  $F$ , and thus,  $H_0$  is rejected with a significance level

of 0.001 ( $P$  value for acceptance of  $H_0$  is  $1.48 \times 10^{-96}$ ). Therefore, it is concluded that  $k_{WT} \neq k_{CS}$ .

**(B)** Distribution of  $K$  and non-parametric tests. Using estimated  $M_{WT}$  and  $M_{CS}$ ,  $k_{WT}$  and  $k_{CS}$  can be calculated for each of 400 data pairs of  $\mathbf{R}$  and  $\mathbf{t}$  for each of WT and CS. These two sets of  $k$  values,  $K_{WT}$  and  $K_{CS}$ , have 400 elements each, the distributions of which are shown here. Non-parametric tests for the difference between  $K_{WT}$  and  $K_{CS}$  were performed using Origin™ 8 Pro software (Origin Lab Corp) and an “R” package “lawstat”. For the Kolmogorov-Smirnov test and Wilcoxon-Mann-Whitney test, let  $H_0$ : median ( $K_{WT}$ ) = median ( $K_{CS}$ ) and  $H_I$ : median ( $K_{WT}$ ) > median ( $K_{CS}$ ). The Kolmogorov-Smirnov test showed a  $D$  value of 0.26 and  $P$  value of  $2.5 \times 10^{-12}$ , and the Wilcoxon-Mann-Whitney test showed a  $U$  value of 63,358 and  $P$  value of  $3.5 \times 10^{-7}$  (Origin™ 8 Pro). Therefore, both tests indicated that the medians of  $K_{WT}$  and  $K_{CS}$  were significantly different with a risk rate of 0.001.

For the Brunner-Munzel test, let  $H_0$ :  $P = 0.5$  and  $H_I$ :  $P > 0.5$ , where  $P = P(K_{WT} > K_{CS}) + \frac{1}{2} P(K_{WT} = K_{CS})$ . This test does not assume any distribution pattern or homoscedasticity. Calculation with an “R” package “lawstat” showed a degree of freedom of 737.929,  $W$  value of 45.763, estimated  $P$  value of 0.927, and  $P$  value of less than  $2.2 \times 10^{-16}$ . Therefore, the Brunner-Munzel test also indicated that the averages of  $K_{WT}$  and  $K_{CS}$  were significantly different with a risk rate of 0.001. All of these analyses indicated that  $k_{WT}$  and  $k_{CS}$  estimated by two data sets,  $K_{WT}$  and  $K_{CS}$ , were significantly different, i.e., that WT and CS have significantly different recovery rates.

All four statistical tests described above also showed significant difference between the estimated WT and p94KI (KI) curves ( $r = Ae^{-kt}$ ;  $A_{WT} = 4.56$ ,  $k_{WT} = 1.01$ ,  $A_{KI} = 8.80$ ,  $k_{KI} = 1.18$ ) shown in Figure 3Q (Parameters, in order, are:  $N = 377$ ,  $F_{1, N-4}(\alpha = 0.001) = 11.0$ ,  $F = 39.9$ ,  $P = 7.76 \times 10^{-10}$ ;  $D = 0.68$  (for  $A$ ) and  $0.54$  (for  $k$ ),  $P = 6.46 \times 10^{-39}$  and  $1.69 \times 10^{-24}$ ,  $U = 3,020$  and  $5,527$ ,  $P = 3.73 \times 10^{-44}$  and  $5.98 \times 10^{-31}$ ;  $df = 368$  and  $365$ ,  $W = 29.6$  and  $17.7$ ,  $p = 0.915$  and  $0.845$ ,  $P < 2.2 \times 10^{-16}$  and  $< 2.2 \times 10^{-16}$ ).

**Supplemental Figure S7. Change in the MARP2 level in WT and p94KI mice after exercise.**

The MAPR2 protein amount in WT, WT-ex, p94KI, and p94KI-ex mouse muscles was analyzed by western blotting using an anti-MARP2 Ab. TA muscles (total extract) were isolated immediately after exercise. The Mhc bands stained by CBB, used as loading controls, are shown. Hairlines indicate lanes that were run on the same gel but were noncontiguous.

**Supplemental Figure S8. Specificities of the anti-MARP2 Abs used in this study.**

(A) Characterization of two anti-MARP2 Abs used in this study by immunoblot analysis. The anti-MARP2 Ab described in reference (5) and that purchased from Protein Tech Group Inc. are called "anti-MARP2" and "anti-Ankrd2" Abs for descriptive purposes here. To verify the specificity of these anti-MARP2 Abs, they were compared with those absorbed with an excess amount of recombinant His-tagged full-length human MARP2 protein (5). Sup fractions from WT (WT) and p94KI (p94KI) mouse TA muscles, and His-tagged full-length human MARP2 (His-MARP2, 50 ng/lane) as a positive control were used for immunoblot analyses with the indicated Abs. CBB-stained His-MARP2 and actin bands, used as a loading control, are shown.

(B-S) Characterization of the anti-MARP2 Ab by immunostaining. Muscle cross (B-M, T-e) and longitudinal (N-S, f-k) sections from WT (B-D, H-J, N-P, T-V, Z-b, f-h), and p94KI (E-G, K-M, Q-S, W-Y, c-e, i-k) mice were stained with anti-laminin  $\alpha 2$  (B, E, H, K, T, W, Z, c), anti-MARP2 (C, F, O, R), absorbed anti-MARP2 (I, L), anti-Ankrd2 (U, X, g, j), absorbed anti-Ankrd2 (a, d), and anti-sarcomeric  $\alpha$ -actinin (N, Q, f, i) Abs.

Nuclei were visualized with DAPI (light blue in B, D, E, G, H, J, K, M, P, S, T, V, W, Y, Z, b, c, e, h, k).

Merged images are shown in D, G, J, M, P, S, V, Y, b, e, h, and k. Bars, 50  $\mu$ m.

**Supplemental Figure S9. MARP2 is expressed in the cytosol and in myonuclei, but not in the nuclei of satellite cells.**

(A-F) To determine the localization of satellite cells, cryostat sections of TA muscles of WT (A-C) and p94KI (D-F) mice were immunostained with anti-M-cadherin (A and D) and anti-laminin  $\alpha 2$  (B and E) Abs after blocking with MOM<sup>TM</sup> mouse Ig blocking reagent (Vector Laboratories, Inc.). Images were visualized by confocal fluorescence microscopy (LSM510, Zeiss). M-cadherin is a marker for satellite cells, which were located beneath the laminin-positive basement membrane (arrowheads in A, C, D, and F).

(G-L) Confocal micrographs of M-cadherin (G and J) and MARP2 (H and K) in muscles from exercised WT (G-I) and p94KI (J-L) mice. The nuclei of satellite cells had no MARP2 signals (arrowheads in G-L).

Merged images are shown at the right (C, F, I, and L). Insets in C, F, I, and L are magnified images of the regions marked by squares. Bars, 10  $\mu$ m.

**Supplemental Figure S10. Proteins with significantly different expression in the cytosol of WT and p94KI skeletal muscles.**

Relative protein expression amounts of WT, WT-ex, p94KI, and p94KI-ex mice were analyzed by iTRAQ<sup>TM</sup>-labeling, 2D-LC-MALDI-TOF/TOF, and ProteinPilot<sup>TM</sup> software. Proteins that have %Cov of non zero value and show p94KI/WT of WT/p94KI > 1.1 are listed here in order of the p94KI/WT value (%Cov means % of amino acid residues (aar) included in the identified peptides with a confidence level of more than 95 against total aar of the protein). Ratios of greater than 1.1, greater than 1.2, less than 1/1.1 (0.91), and less than 1/1.2 (0.83) are marked by red, orange, pale blue, and blue colors, respectively. *P*-values were calculated by the ProteinPilot<sup>TM</sup> program for proteins that are identified by more than one peptide; otherwise, they are shown by "-". *P*-values

less than 0.05 are colored yellow. For proteins that had no *P*-value due to single MS/MS identification or a *P*-value of more than 0.05, MS/MS spectra were manually examined and verified, and are listed only if the MS/MS spectra were clear enough to represent a change in ratios. mRNA expression profiles are shown for genes on the DNA microarray (see Supplemental Table S1); NC, not significantly changed; -, not included in the microarray chip used.

Note that hexokinase 2, one of the rate-limiting enzymes for glycolysis, and factors involved in protein translation (EF-Tu and eEF-1 $\gamma$ ), and proteasome subunits (PSMA4 and PSMD7) were upregulated in p94KI and WT-ex compared with WT (category **b** in Table 1). Members of this group may contribute to turnover of muscle cells by providing ATP, and producing and destructing proteins. Also, UbcH7, Nedd8, RSK-1 and S36mt, which are involved in protein degradation and translation systems, are also upregulated in WT-ex and p94KI (compared with WT) and p94KI-ex (compared with p94KI) (category **a** in Table 1). On the other hand, calsequestrin 1 (CASQ1), parvalbumin and myosin regulatory light chain 2, which binds Ca<sup>2+</sup>, are all downregulated in p94KI and WT-ex compared with WT (category **d** in Table 1).

Troponin I2 (TNNI2) and nicotinamide phosphoribosyltransferase (NAMPT) were upregulated in p94KI (compared with WT), but downregulated in p94KI-ex (compared with p94KI), whereas WT-ex showed no difference from WT. Conversely, programmed cell death protein 11 (PDCD11 or ALG-4) and carbonic anhydrase 3 (CAR3) were downregulated in p94KI (compared with WT), but upregulated in p94KI-ex (compared with p94KI), whereas WT-ex showed no difference from WT. These proteins may correspond to those perturbed upon exercise without p94 protease activity, but are modulated to be unchanged during exercise in WT mice.

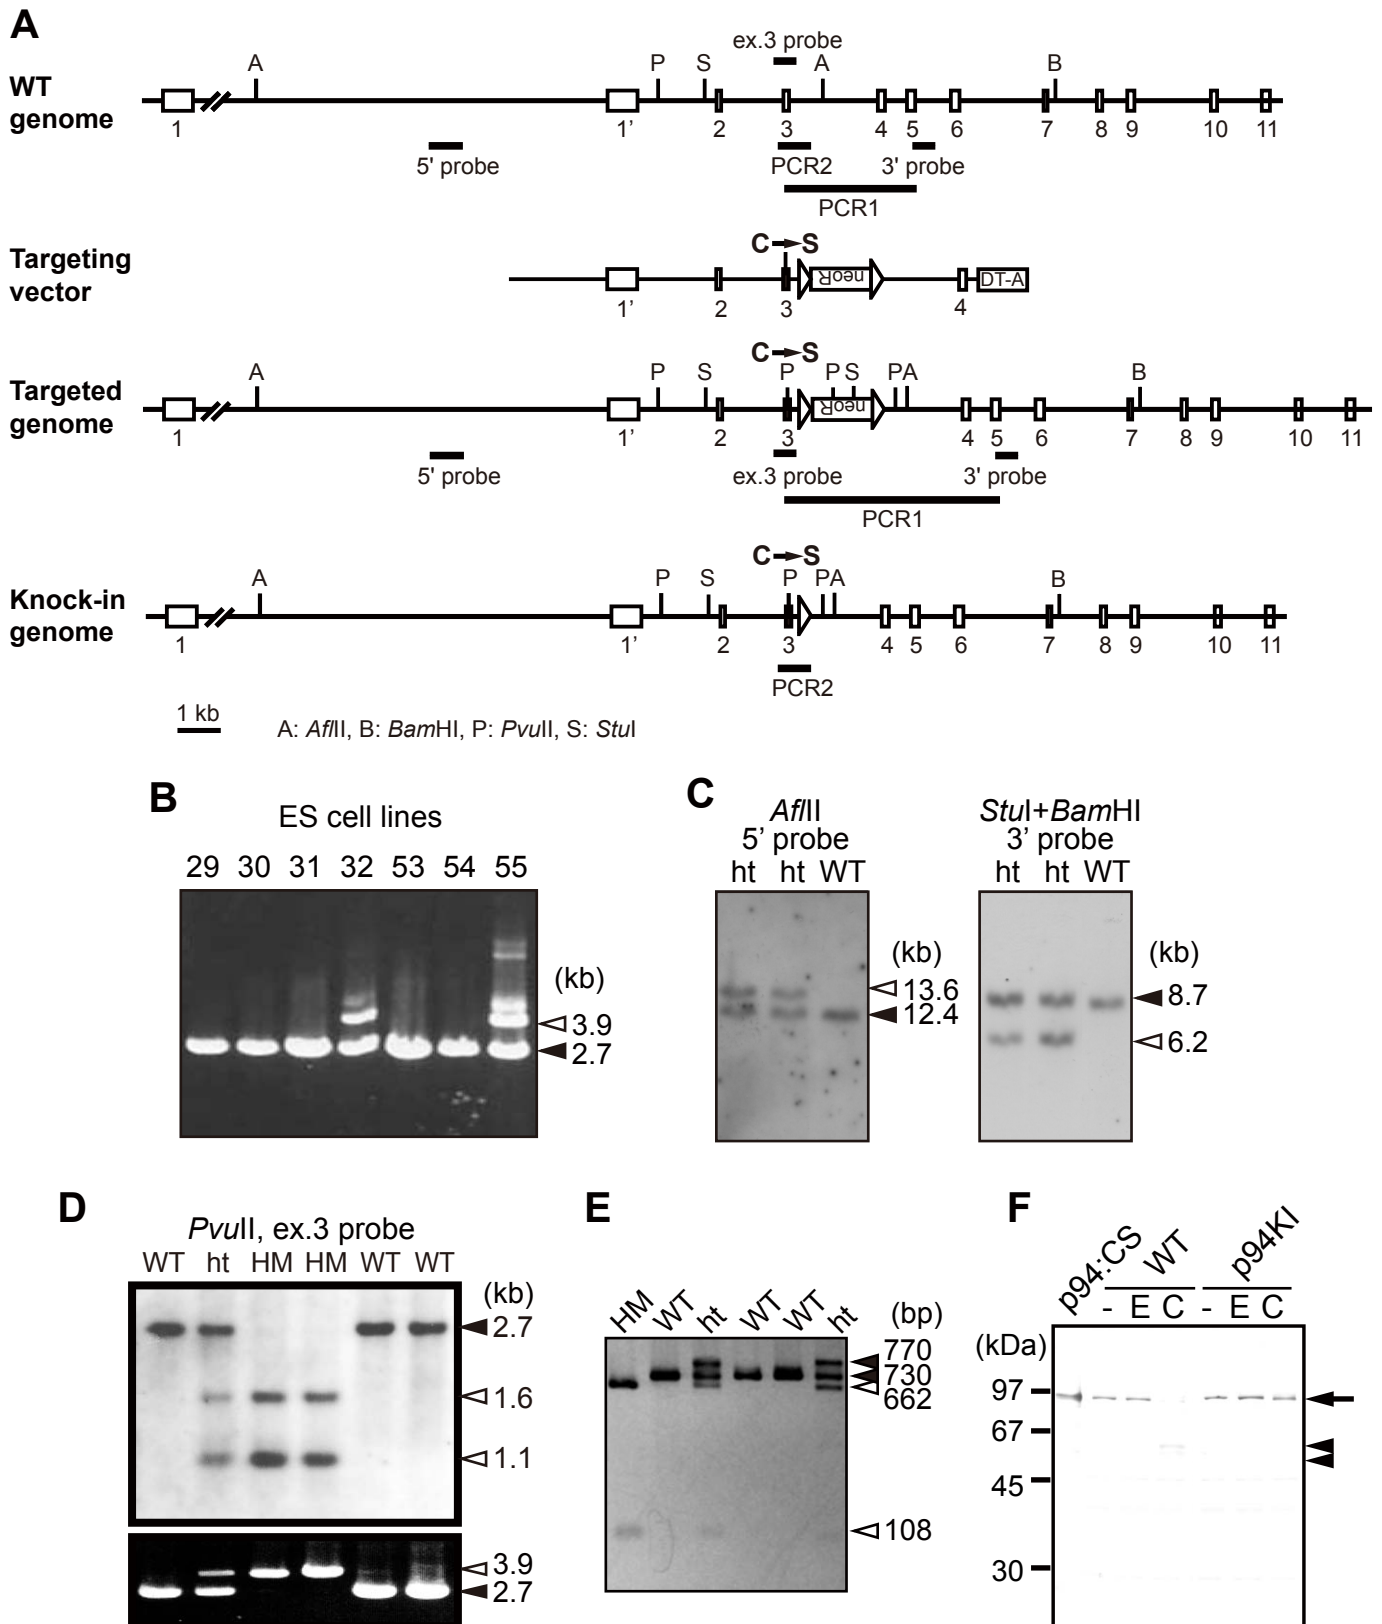

### Supplemental Figure S1. Generation of p94KI mice.

(A) Targeting scheme for the p94KI construct. A missense mutation [6th T to A in exon 3 of the p94/calpain 3 gene, *Capn3* (agGGGACTGCTGGTTT → agGGGACAGCTGGTTT)], was introduced into exon 3 by performing PCR on a 1.7-kb *Bst*PI fragment subcloned from 129S mouse genomic DNA. The missense mutation changed Cys129, an amino acid residue in the catalytic center of p94, to Ser, and created a *Pvu*II site. The complete nucleotide sequence of the mutated 1.7-kb *Bst*PI fragment was verified by DNA sequencing. (Legend continues on the next page.)



(Continued from the previous page) A neomycin-resistance gene (*neoR*) flanked by loxP sequences was constructed as follows. A DNA fragment was generated by PCR using primers lox1s and lox1a (see Table S2) and pMC1neo polyA<sup>+</sup> vector DNA (Stratagene) as a template. The 3'-part of the fragment was rescued by cutting it with *RsrII* and *BamHI*, which resulted in a *neoR*-loxP 3' fragment of 255 bp, and the fragment was cloned into the 3.6-kb pMC1neo polyA<sup>+</sup>/*RsrII*-*BamHI* fragment (Plasmid A). The 5'-loxP part was amplified by performing half-nested PCR, first with primers lox2s-1 and lox2a and then with lox2s-2 and lox2a, on pMC1neo polyA<sup>+</sup> plasmid DNA. The amplified PCR fragment was cloned into the TA TOPO cloning vector (Invitrogen), and the 5'-loxP-containing *SpeI*-*ClaI* fragment (*SpeI*-TOPO vector-*NdeI*-loxP-*ClaI*) was used for ligation with the *XhoI*-*SpeI* fragment (*XhoI*-*neoR*-loxP-*NdeI*-*SpeI*) of Plasmid A described above, resulting in loxP-*neoR*-loxP flanked by *NdeI* sites (*NdeI*-loxP-*neoR*-loxP-*NdeI*) in the TOPO vector. The *neoR* cassette was cut by *NdeI* and inserted into the *NdeI* site located 280-bp downstream of the exon 3-intron 3 junction of *Capn3*.

The C129S mutation and *neoR* cassette insertion were then ligated together, and the *HindIII*-*BglIII* fragment of pMCDT-A(A+T/pau) (Oriental Yeast) was added to the 3'-end of the final targeting vector. The targeting vector was introduced into mouse E14tg2a modified embryonic stem (ES) cells (1) by electro-transfection (*Capn3*<sup>C129S-*neo*+</sup>). Among the 120 ES colonies that survived in G418 selection medium, 6 were positive for the targeting vector as determined by PCR screening (see B). The recombinant ES cell lines were also characterized by Southern blot analysis (see C). Isolated genomic DNA was digested with *AflIII* or *StuI*+*BamHI*, and hybridized with the 5' or 3' probe indicated. Cell lines #32 and #55 were used for blastocyst injection, and both produced germline-transmitted chimeric mice. The F1 heterozygotes (*Capn3*<sup>C129S-*neo*+</sup>) were analyzed by Southern blot analysis (see D) to confirm proper recombination, and were crossed with transgenic mice expressing the Cre recombinase in germline cells, B6.FVB-TgN(EIIa-Cre)C5379Lmgd (2). Both the #32 and #55 lines produced mice with the C129S mutation without *neoR* (*Capn3*<sup>C129S</sup>), which was confirmed by PCR and Southern blot analyses (see D), and eventually showed apparently identical phenotypes (data not shown). Therefore, the #55 line was used for further experiments. The p94KI mice were backcrossed with C57BL/6 J mice for more than 8 generations. The mouse genotypes were determined by genomic Southern blot and PCR analyses. The PCR primers are listed in Table S2.

The numbers indicate exons. LoxP sites were inserted on both sides of a *neoR* cassette. PCR1 and PCR2 indicate the amplified regions used to detect the allele by homologous recombination. DT-A, diphtheria toxin A fragment.

**(B)** PCR screening of ES cell colonies. Genomic DNA isolated from G418-resistant ES cell lines was subjected to PCR amplification of the targeted region shown in (A) as "PCR1". Closed and open arrowheads indicate the amplified bands of the WT and mutant samples, respectively. ht, heterozygous; HM, homozygous.

**(C)** Southern blot analysis of F1 mice. Genomic DNA isolated from the tails of mice resulting from crosses between targeted chimeras and WT mice was digested with *AflIII* or *StuI*+*BamHI*, and subjected to Southern blot analysis using the 5' and 3' probes indicated in A. Closed and open arrowheads indicate bands corresponding to the WT and mutant alleles, respectively. ht, heterozygous.

**(D)** Southern blot and PCR analysis of p94KI. Genomic DNA from mice derived from crosses between p94KI and WT mice was digested with *PvuII* and subjected to Southern blot analysis using the ex.3 probe indicated in A (upper). The same genomic DNA was subjected to PCR amplification using the same conditions as in (B) (lower). Closed and open arrowheads indicate bands corresponding to the WT and mutant alleles, respectively. ht, heterozygous; HM, homozygous.

**(E)** Confirmation of the C129S mutation in p94KI mice. Genomic DNA from the mouse tail was amplified by PCR and digested by *PvuII*, generating fragments of 662 and 108 bp (open arrowheads) for homozygotes (HM), 730 bp (closed arrowheads) for WT mice (WT), and 108, 662, 730, and 770 bp for heterozygotes (ht).

**(F)** Proteolytic inactivity of p94 in p94KI mice. Equal amounts of protein from skeletal muscle lysates of WT and p94KI mice (15-weeks old) were incubated with 10 mM EDTA or 5 mM CaCl<sub>2</sub> at 30°C for 30 min. Full-length p94 (arrow) and its proteolytic fragments (arrowheads) were detected with an anti-p94 (pIS2C) antibody. -, no treatment; E, +EDTA; C, +Ca<sup>2+</sup>.

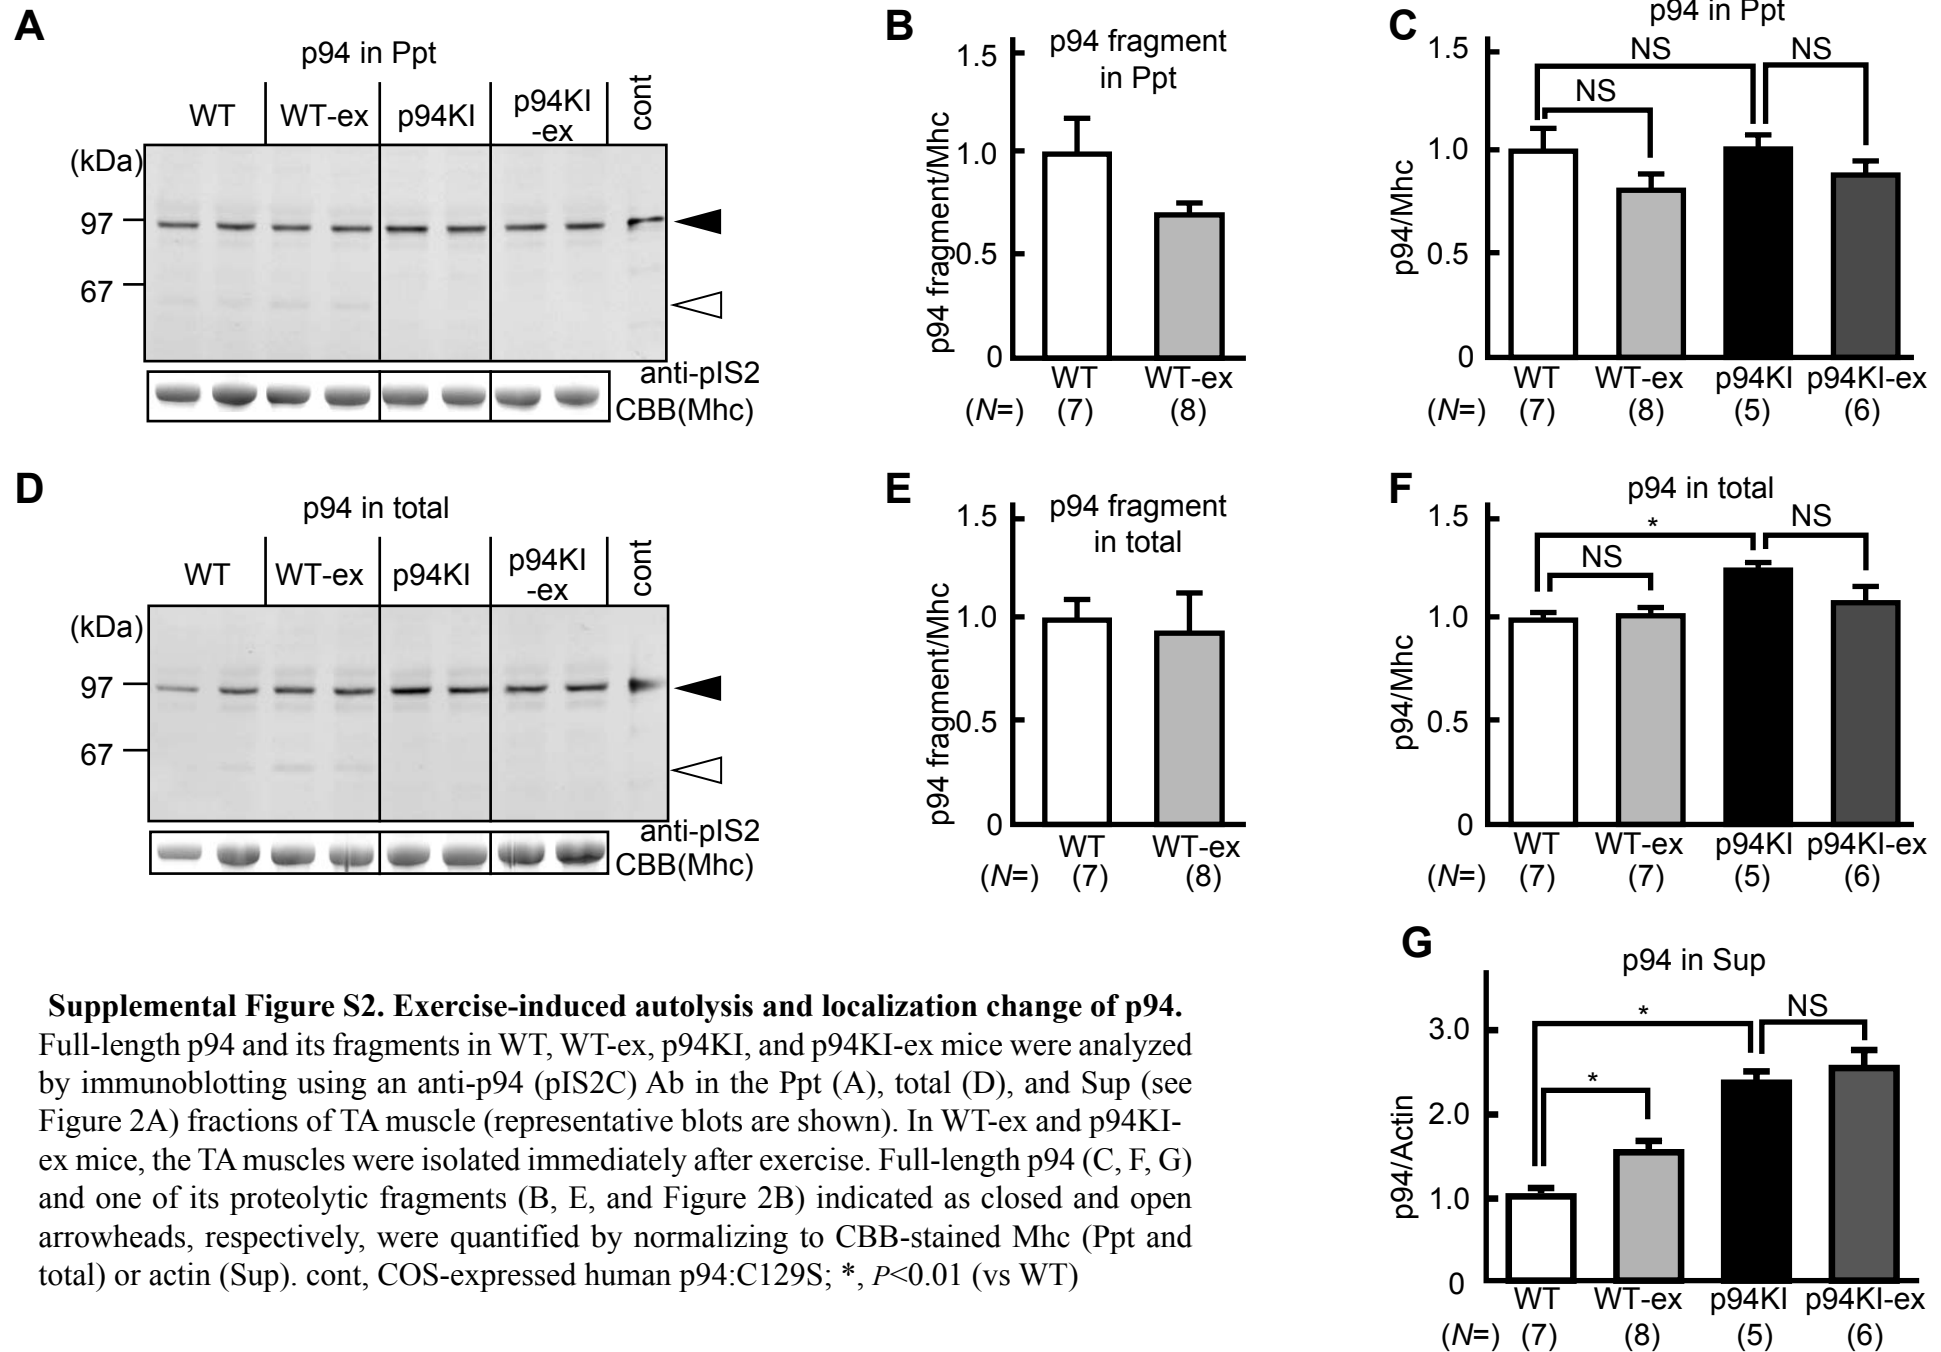

### Supplemental Figure S2. Exercise-induced autolysis and localization change of p94.

Full-length p94 and its fragments in WT, WT-ex, p94KI, and p94KI-ex mice were analyzed by immunoblotting using an anti-p94 (pIS2C) Ab in the Ppt (A), total (D), and Sup (see Figure 2A) fractions of TA muscle (representative blots are shown). In WT-ex and p94KI-ex mice, the TA muscles were isolated immediately after exercise. Full-length p94 (C, F, G) and one of its proteolytic fragments (B, E, and Figure 2B) indicated as closed and open arrowheads, respectively, were quantified by normalizing to CBB-stained Mhc (Ppt and total) or actin (Sup). cont, COS-expressed human p94:C129S; \*,  $P < 0.01$  (vs WT)

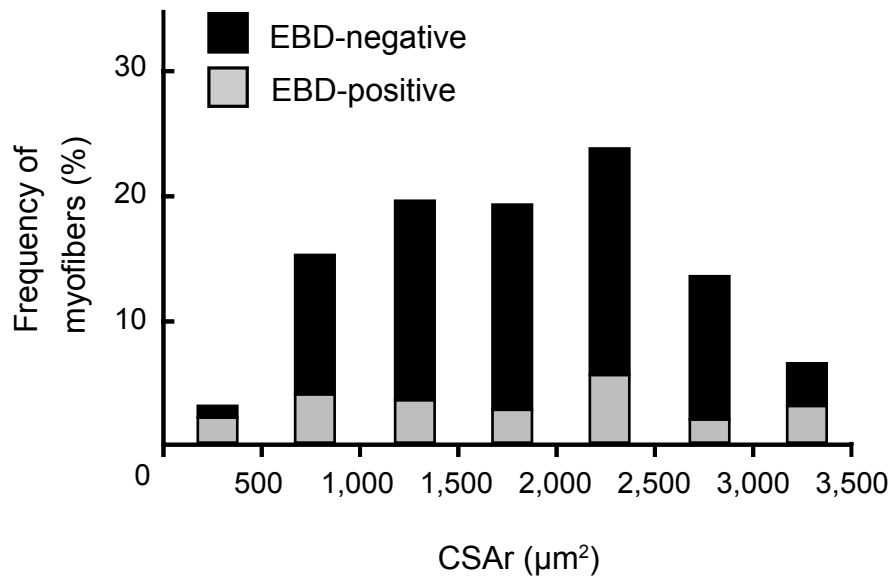

**Supplemental Figure S3. Frequency distribution of EBD-negative and -positive myofiber CSAr in the Gastrocnemius (GC) of p94KI-ex mice on post-exercise day 1**

A total of 378 EBD-negative (undamaged) and 110 EBD-positive fiber profiles were traced in two sections from each of three p94KI-ex mice. The average CSAr was  $1,817 \mu\text{m}^2$  and  $1,933 \mu\text{m}^2$  for the EBD-negative and -positive myofibers, respectively, showing no statistically significant difference.

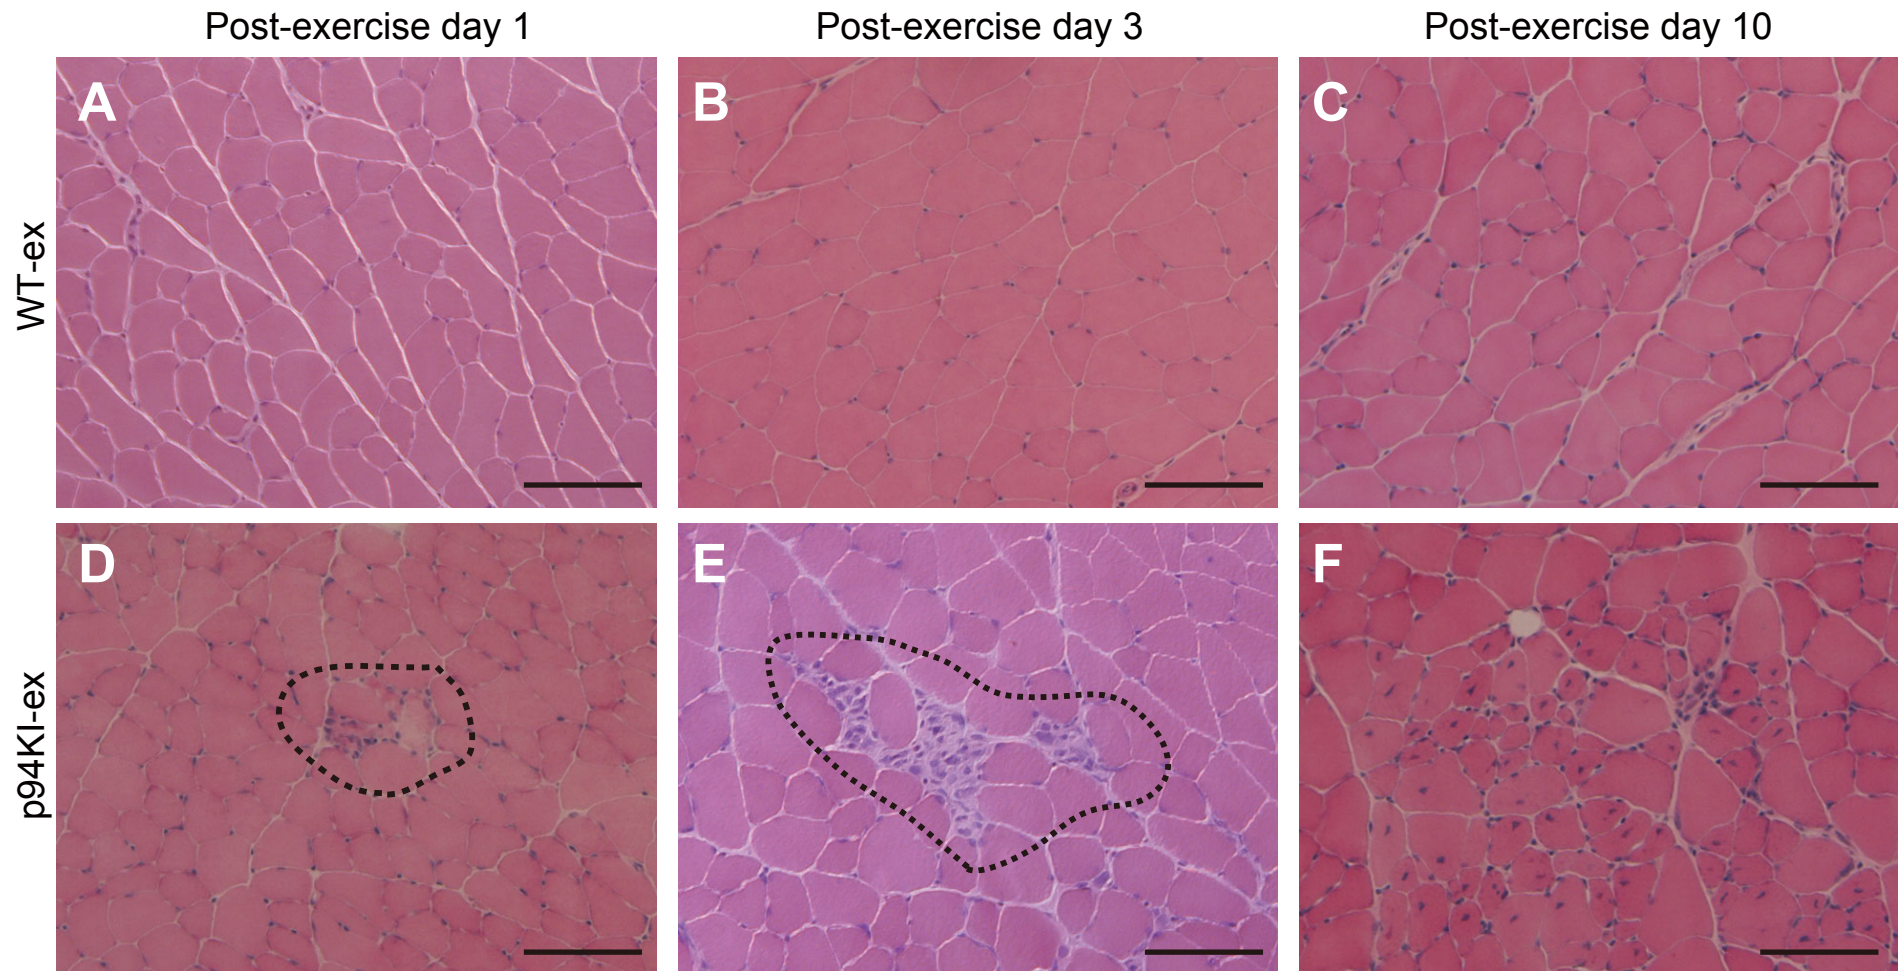

**Supplemental Figure S4. Normal muscle regeneration was observed in exercised p94KI mice.**

Muscle regeneration processes were observed in HE-stained gastrocnemius muscles from WT-ex (A-C) and p94KI-ex (D-F) mice. Muscles were prepared on the indicated days after exercise. The invading cells and proliferating myogenic cells were observed in p94KI-ex mice (dotted areas in D and E). Small-diameter myofibers with central nuclei are de novo regenerated myofibers (F). WT-ex mice showed no obvious damage (A-C). Bars, 100  $\mu$ m.



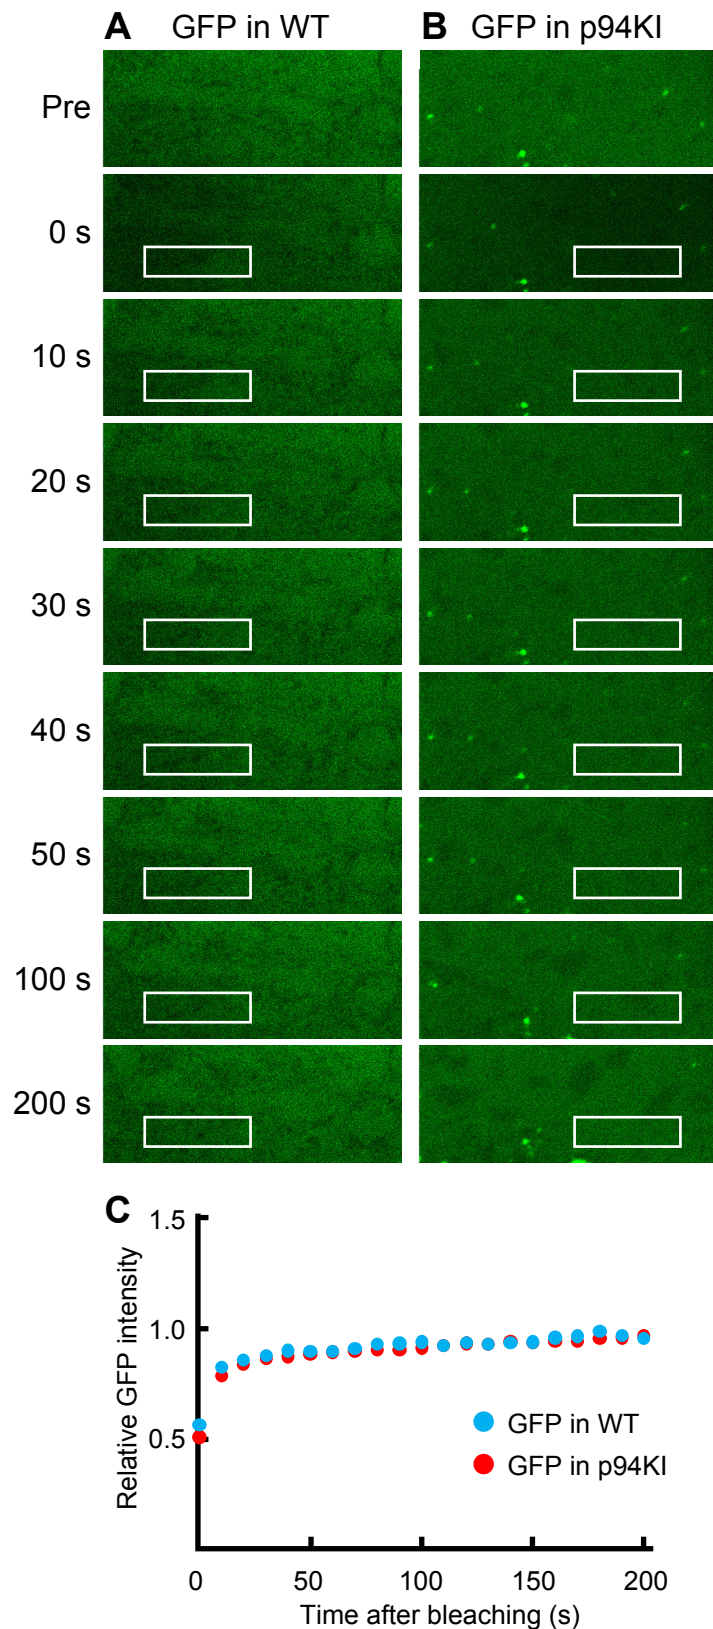

### Supplemental Figure S5. Control experiments for FRAP studies of Figure 3C.

(A and B) FRAP observation of GFP expressed in cultured myotubes. Representative series of micrographs are shown. GFP was exogenously expressed in cultured myotubes from WT (A) or p94KI (B) mice by the transfection of pEGFP empty vector into the myotubes. GFP showed diffuse and uniform signals in the cytosol without striation. Reference images were acquired before photobleaching (Pre). Rectangles indicate the photobleached areas. (C) Relative fluorescence intensities in the areas were calculated by LSM software as the ratio of GFP intensity at each time point to that before photobleaching, and plotted against time. The GFP signals could not be photobleached to 0% because the mobility of GFP in the cytosol was too fast, and was quickly recovered to almost to 90% within 30 s.

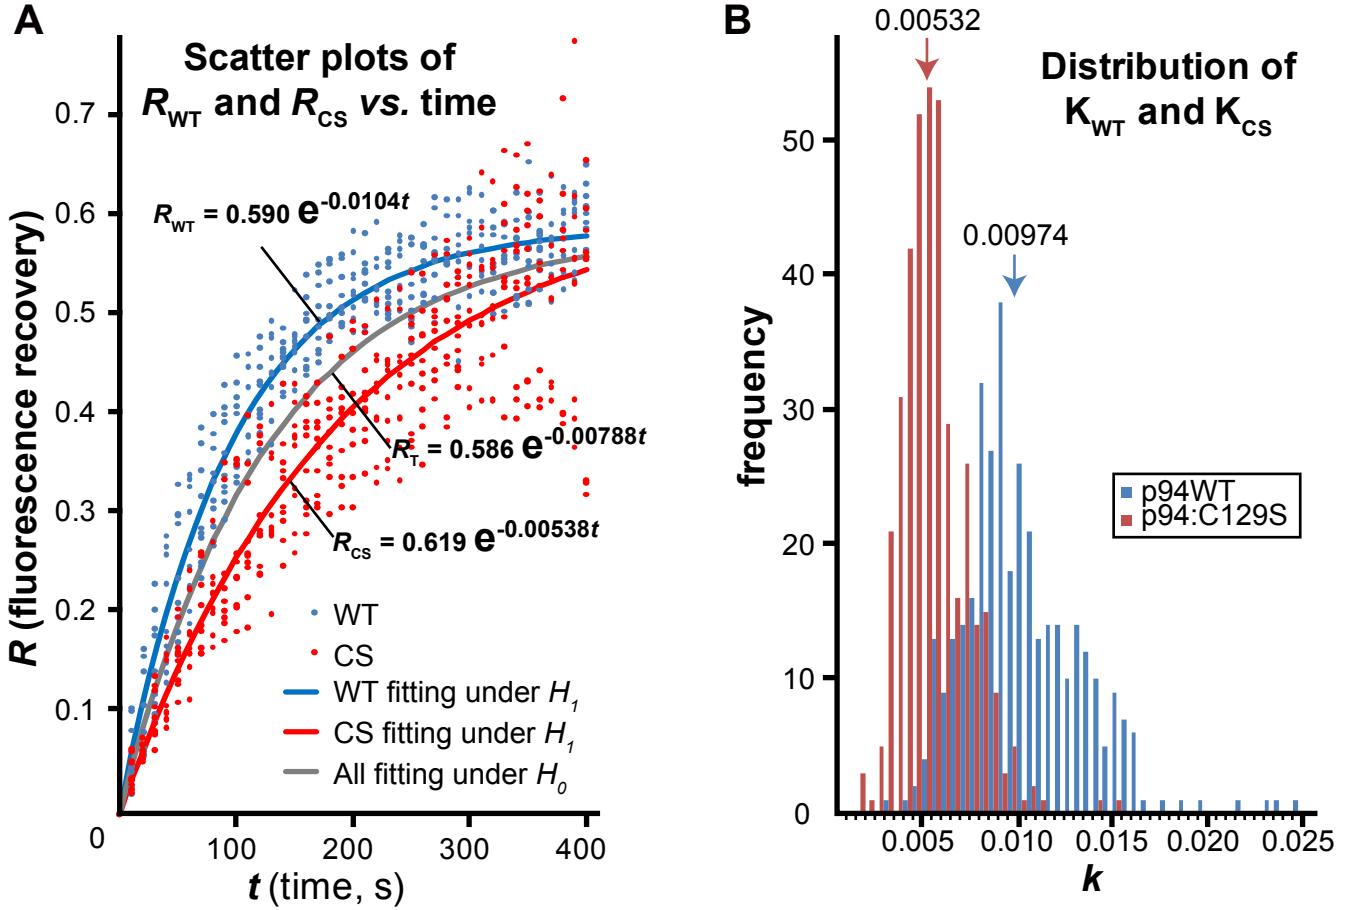

**Supplemental Figure S6. Statistical tests for the significant difference between the  $k$  values for p94WT and p94:C129S in Figure 3C.**

(A) Scatter plots of  $R$  vs. time and analysis of covariance. Observation time ( $t$ , s) and relative recovery of GFP fluorescence intensity ( $R_{WT}$  and  $R_{CS}$  for p94WT (WT) and p94:C129S (CS) experiments, respectively) were well fitted to the equation,  $R = M(1 - e^{-kt})$ , and we obtained estimated values of  $M$  and  $k$  for both WT and CS ( $M_{WT}$ ,  $k_{WT}$ ,  $M_{CS}$ , and  $k_{CS}$  are estimated to be 0.590, 0.0104, 0.619, and 0.00538, respectively, as shown here and in Figure 3C).

First, the following two hypotheses are taken:  $H_0: k_{WT} = k_{CS}$  and  $H_1: k_{WT} \neq k_{CS}$  (both sides)

Under  $H_1$ , the residual sums of squares for WT and CS are calculated using each of 400 data pairs ( $(R_{WTi}, t_i)$  and  $(R_{CSi}, t_i)$  [ $i = 1$  to 400]):

$$\Delta WT = \sum_{i=1}^{400} (R_{WTi} - M_{WT}(1 - e^{-k_{WT}t_i}))^2 = 0.562; \Delta CS = \sum_{i=1}^{400} (R_{CSi} - M_{CS}(1 - e^{-k_{CS}t_i}))^2 = 1.590; \Delta 1 = \Delta WT + \Delta CS = 2.152$$

Under  $H_0$ , all 800 data pairs (400 WT and 400 CS) were fitted as described above, and the following equation was obtained:

$R_T = M_T(1 - e^{-k_T t})$ , where  $M_T$  and  $k_T$  are estimated to be 0.5859 and 0.00788 by the least squares method.

The residual sums of squares for all 800 data pairs were calculated using two of the 400 data pairs ( $(R_{WTi}, t_i)$  and  $(R_{CSi}, t_i)$  [ $i = 1$  to 400]):

$$\Delta 2 = \sum_{i=1}^{400} (R_{WTi} - M_T(1 - e^{-k_T t_i}))^2 + \sum_{i=1}^{400} (R_{CSi} - M_T(1 - e^{-k_T t_i}))^2 = 3.834$$

A statistical value,  $F$  is defined as follows:  $F = \frac{\Delta 2 - \Delta 1}{\Delta 1 / (N - 4)} = \frac{(\Delta 2 - \Delta 1)}{\Delta 1} \times (N - 4) = 578.7$ , where  $N$  = the number of total samples (in our case, 400 + 400 - 56 (inappropriate data) = 744). By analysis of covariance, under  $H_0$ ,  $F$  is known to follow the  $F$  distribution with the degrees of freedom,  $v_1 = 1$  and  $v_2 = N - 4$  [ $F_{1, N-4}$ ]. Since the upper point where  $F_{1, N-4}$  shows 0.001 probability ( $F_{1, N-4}(\alpha = 0.001)$ ) is 10.91, and is less than the calculated  $F$ , and thus,  $H_0$  is rejected with a significance level of 0.001 ( $P$  value for acceptance of  $H_0$  is  $1.48 \times 10^{-96}$ ). Therefore, it is concluded that  $k_{WT} \neq k_{CS}$ .

(B) Distribution of  $K$  and non-parametric tests. Using estimated  $M_{WT}$  and  $M_{CS}$ ,  $k_{WT}$  and  $k_{CS}$  can be calculated for each of 400 data pairs of  $R$  and  $t$  for each of WT and CS. These two sets of  $k$  values,  $K_{WT}$  and  $K_{CS}$ , have 400 elements each, the distributions of which are shown here. Non-parametric tests for the difference between  $K_{WT}$  and  $K_{CS}$  were performed using Origin™ 8 Pro software (Origin Lab Corp) and an “R” package “lawstat”. For the Kolmogorov-Smirnov test and Wilcoxon-Mann-Whitney test, let  $H_0$ : median ( $K_{WT}$ ) = median ( $K_{CS}$ ) and  $H_1$ : median ( $K_{WT}$ ) > median ( $K_{CS}$ ). The Kolmogorov-Smirnov test showed a  $D$  value of 0.26 and  $P$  value of  $2.5 \times 10^{-12}$ , and the Wilcoxon-Mann-Whitney test showed a  $U$  value of 63,358 and  $P$  value of  $3.5 \times 10^{-7}$  (Origin™ 8 Pro). Therefore, both tests indicated that the medians of  $K_{WT}$  and  $K_{CS}$  were significantly different with a risk rate of 0.001. For the Brunner-Munzel test, let  $H_0$ :  $p = 0.5$  and  $H_1$ :  $p > 0.5$ , where  $p = P(K_{WT} > K_{CS}) + \frac{1}{2} P(K_{WT} = K_{CS})$ . This test does not assume any distribution pattern or homoscedasticity. Calculation with an “R” package “lawstat” showed a degree of freedom of 737.929,  $W$  value of 45.763, estimated  $p$  value of 0.927, and  $P$  value of less than  $2.2 \times 10^{-16}$ . Therefore, the Brunner-Munzel test also indicated that the averages of  $K_{WT}$  and  $K_{CS}$  were significantly different with a risk rate of 0.001. All of these analyses indicated that  $k_{WT}$  and  $k_{CS}$  estimated by two data sets,  $K_{WT}$  and  $K_{CS}$ , were significantly different, i.e., that WT and CS have significantly different recovery rates.

All four statistical tests described above also showed significant difference between the estimated WT and p94KI (KI) curves ( $r = Ae^{-kt}$ ,  $A_{WT} = 4.56$ ,  $k_{WT} = 1.01$ ,  $A_{KI} = 8.80$ ,  $k_{KI} = 1.18$ ) shown in Figure 3Q (Parameters, in order, are:  $N = 377$ ,  $F_{1, N-4}(\alpha = 0.001) = 11.0$ ,  $F = 39.9$ ,  $P = 7.76 \times 10^{-10}$ ,  $D = 0.68$  (for  $A$ ) and 0.54 (for  $k$ ),  $P = 6.46 \times 10^{-39}$  and  $1.69 \times 10^{-24}$ ;  $U = 3,020$  and 5,527,  $P = 3.73 \times 10^{-44}$  and  $5.98 \times 10^{-31}$ ;  $d_f = 368$  and 365,  $W = 29.6$  and 17.7,  $p = 0.915$  and 0.845,  $P < 2.2 \times 10^{-16}$  and  $< 2.2 \times 10^{-16}$ ).

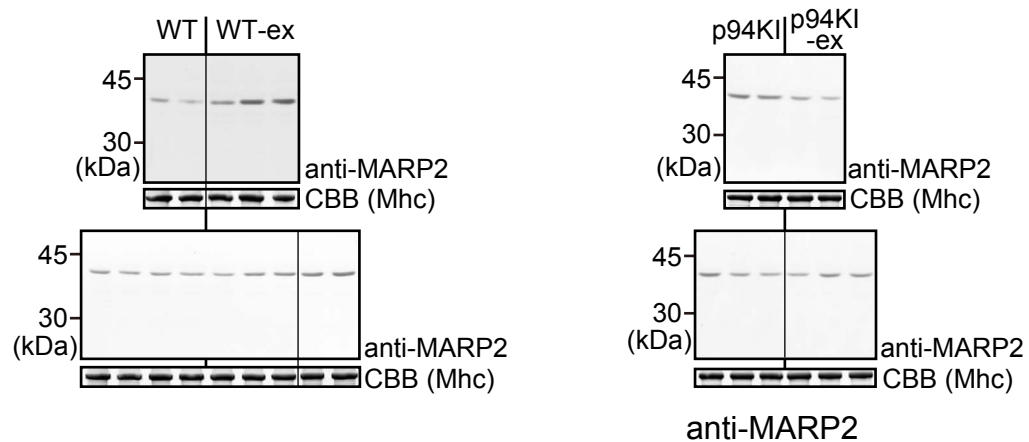

**Supplemental Figure S7. Change in the MARP2 level in WT and p94KI mice after exercise.**

The MARP2 protein amounts in WT, WT-ex, p94KI, and p94KI-ex mouse muscles were analyzed by western blotting using an anti-MARP2 Ab. TA muscles (total extract) were isolated immediately after exercise. The Mhc bands stained by CBB, used as loading controls, are shown. Hairlines indicate lanes that were run on the same gel but were noncontiguous.



## Supplemental Figure S8.

## Specificities of the anti-MARP2

## Abs used in this study.

(A) Characterization of two anti-MARP2 Abs used in this study by immunoblot analysis. The anti-MARP2 Ab described in reference (5) and that purchased from Protein Tech Group Inc. are called "anti-MARP2" and "anti-Ankrd2" Abs for descriptive purposes here. To verify the specificity of these anti-MARP2 Abs, they were compared with those absorbed with an excess amount of recombinant His-tagged full-length human MARP2 protein (5). Sup fractions from WT (WT) and p94KI (p94KI) mouse TA muscles, and His-tagged full-length human MARP2 (His-MARP2, 50 ng/lane) as a positive control were used for immunoblot analyses with the indicated Abs. CBB-stained His-MARP2 and actin bands, used as a loading control, are shown. (B-S) Characterization of the anti-MARP2 Ab by immunostaining. Muscle cross (B-M, T-e) and longitudinal (N-S, f-k) sections from WT (B-D, H-J, N-P, T-V, Z-b, f-h), and p94KI (E-G, K-M, Q-S, W-Y, c-e, i-k) mice were stained with anti-laminin  $\alpha 2$  (B, E, H, K, T, W, Z, c), anti-MARP2 (C, F, O, R), absorbed anti-MARP2 (I, L), anti-Ankrd2 (U, X, g, j), absorbed anti-Ankrd2 (a, d), and anti-sarcomeric  $\alpha$ -actinin (N, Q, f, i) Abs. Nuclei were visualized with DAPI (light blue in B, D, E, G, H, J, K, M, P, S, T, V, W, Y, Z, b, c, e, h, k). Merged images are shown in D, G, J, M, P, S, V, Y, b, e, h, and k. Bars, 50  $\mu$ m.

Nuclei were visualized with DAPI (light blue in B, D, E, G, H, J, K, M, P, S, T, V, W, Y, Z, b, c, e, h, k). Merged images are shown in D, G, J, M, P, S, V, Y, b, e, h, and k. Bars, 50  $\mu$ m.

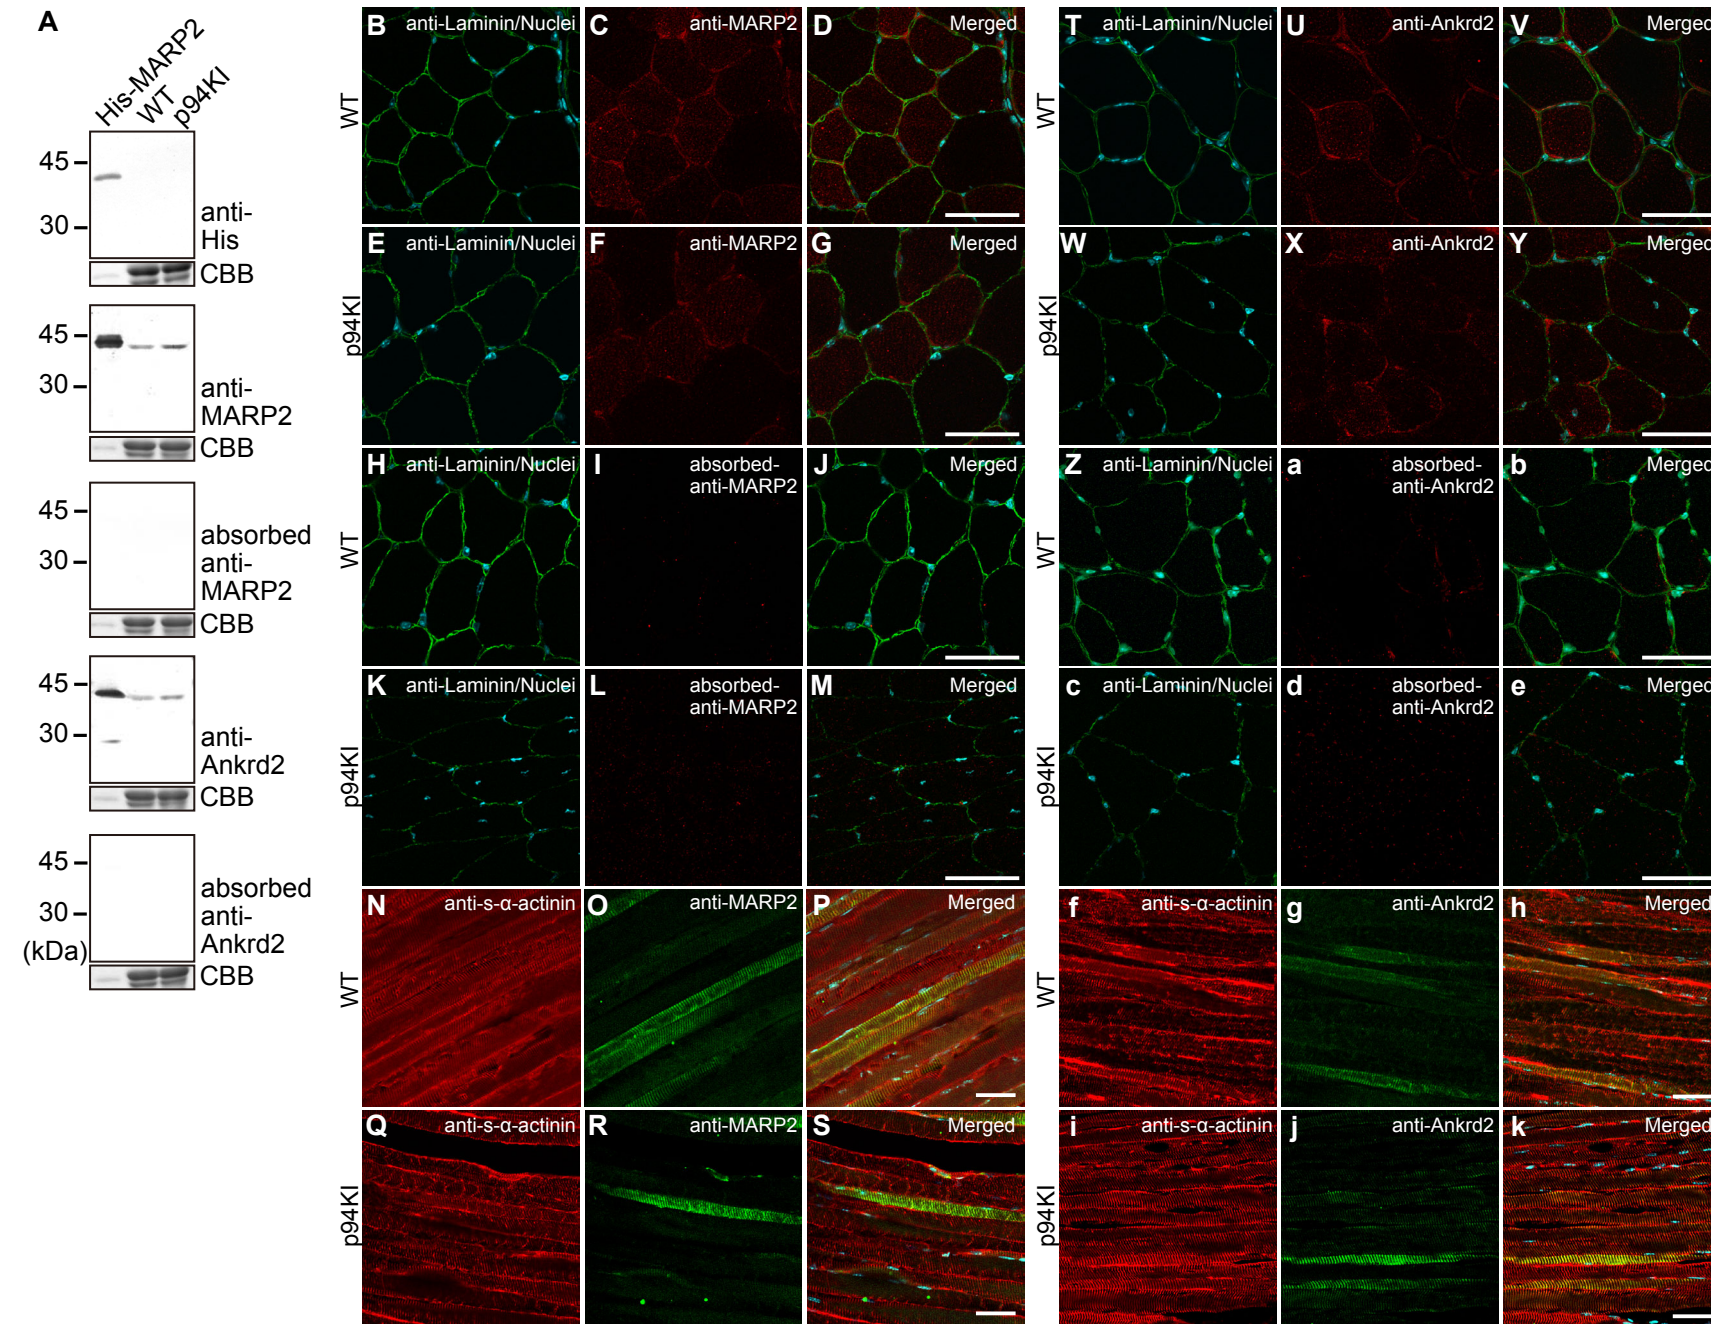



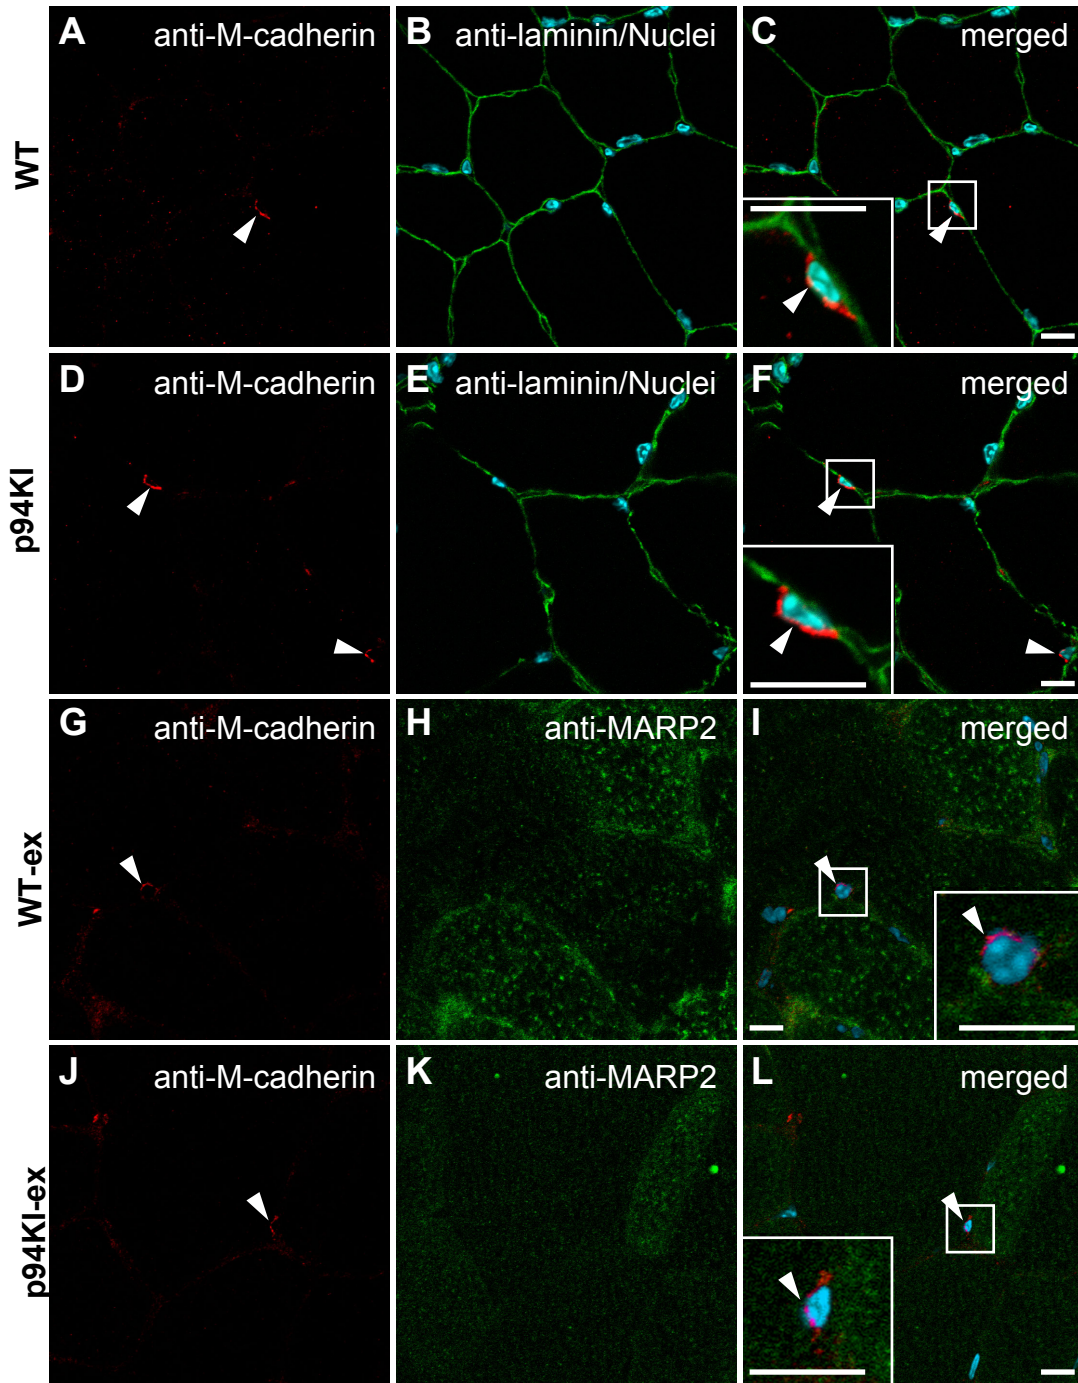

**Supplemental Figure S9. MARP2 is expressed in the cytosol and in myonuclei, but not in the nuclei of satellite cells.**

(A-F) To determine the localization of satellite cells, cryostat sections of TA muscles of WT (A-C) and p94KI (D-F) mice were immunostained with anti-M-cadherin (A and D) and anti-laminin  $\alpha 2$  (B and E) Abs after blocking with MOM<sup>TM</sup> mouse Ig blocking reagent (Vector Laboratories, Inc.). Images were visualized by confocal fluorescence microscopy (LSM510, Zeiss). M-cadherin is a marker for satellite cells, which were located beneath the laminin-positive basement membrane (arrowheads in A, C, D, and F). (G-L) Confocal micrographs of M-cadherin (G and J) and MARP2 (H and K) in muscles from WT-ex (G-I) and p94KI (J-L) mice. The nuclei of satellite cells had no MARP2 signals (arrowheads in G-L).

Merged images are shown at the right (C, F, I, and L). Insets in C, F, I, and L are magnified images of the regions marked by squares. Bars, 10  $\mu$ m.

| gi No.    | Protein name                                                                   | Gene                 | %Cov | p94KI<br>/WT | P-value | WT-ex<br>/WT | P-value | p94KI-<br>ex<br>/p94KI | P-value | DNA<br>micro-<br>array |
|-----------|--------------------------------------------------------------------------------|----------------------|------|--------------|---------|--------------|---------|------------------------|---------|------------------------|
| 13507646  | heat shock protein 8                                                           | <i>Hspb8</i>         | 12.2 | 3.60         | -       | 1.59         | -       | 0.79                   | -       | -                      |
| 40644653  | kinesin family member 15                                                       | <i>Kif15</i>         | 1.3  | 2.87         | 1.2E-02 | 2.53         | 4.5E-03 | 1.07                   | 3.1E-01 | -                      |
| 29294760  | ribosomal protein S6 kinase $\alpha$ -1                                        | <i>Rps6ka1</i>       | 2.6  | 2.06         | 9.0E-02 | 1.81         | 4.5E-02 | 1.70                   | 4.0E-01 | NC                     |
| 74227220  | hydroxyacyl glutathione hydrolase                                              | <i>Hagh</i>          | 8.1  | 1.90         | -       | 1.75         | -       | 0.84                   | -       | -                      |
| 149257950 | 28S ribosomal protein S36, mitochondrial                                       | <i>Mrps36</i>        | 17.6 | 1.86         | -       | 1.33         | -       | 1.12                   | -       | -                      |
| 37359988  | brain specific angiogenesis inhibitor 3                                        | <i>Bai3</i>          | 2.0  | 1.84         | 2.2E-03 | 1.64         | 9.3E-02 | 1.48                   | 1.7E-01 | -                      |
| 187957266 | filamin C $\gamma$                                                             | <i>Flnc</i>          | 0.9  | 1.80         | 4.0E-01 | 1.79         | 3.2E-01 | 0.66                   | 3.2E-01 | -                      |
| 74220201  | ubiquitin conjugating enzyme E2L3, UbcH7                                       | <i>Ube2l3</i>        | 10.7 | 1.71         | -       | 1.70         | -       | 1.24                   | -       | -                      |
| 548879    | Ras suppressor protein 1, RSP-1                                                | <i>Rsu1</i>          | 6.1  | 1.71         | -       | 1.42         | -       | 0.67                   | -       | NC                     |
| 7305143   | hexokinase 2                                                                   | <i>Hk2</i>           | 0.9  | 1.70         | 1.7E-01 | 1.47         | 7.2E-02 | 1.09                   | 5.2E-01 | NC                     |
| 76779273  | chaperonin, HSP60, HSPD1                                                       | <i>Hspd1</i>         | 2.7  | 1.64         | -       | 1.65         | -       | 1.06                   | -       | NC                     |
| 51890211  | leucine rich repeat containing 8 family, member E                              | <i>Lrrc8e</i>        | 1.3  | 1.55         | 2.3E-01 | 1.60         | 6.4E-02 | 0.81                   | 6.2E-01 | -                      |
| 6678682   | galectin 1, lectin, galactose binding, soluble 1                               | <i>Lgals1</i>        | 14.8 | 1.55         | -       | 1.02         | -       | 1.06                   | -       | -                      |
| 18044689  | Ser (or Cys) peptidase inhibitor, clade A, member 3K                           | <i>Serpina3k</i>     | 3.6  | 1.52         | 9.4E-02 | 1.19         | 1.4E-01 | 0.91                   | 4.0E-02 | -                      |
| 29244166  | SH3 and cysteine rich domain 3                                                 | <i>Stac3</i>         | 6.4  | 1.48         | -       | 1.55         | -       | 1.14                   | -       | -                      |
| 74151744  | proteasome subunit, alpha 4                                                    | <i>PsmA4</i>         | 4.2  | 1.45         | 2.9E-01 | 1.72         | 1.8E-01 | 1.05                   | 7.9E-01 | -                      |
| 313103    | myomesin 1                                                                     | <i>Myom1</i>         | 1.6  | 1.44         | -       | 1.59         | -       | 1.31                   | -       | NC                     |
| 74147026  | heat shock protein 90kDa $\alpha$ , class B member 1                           | <i>Hsp90ab1</i>      | 15.2 | 1.42         | 7.3E-03 | 1.44         | 1.7E-03 | 0.92                   | 2.1E-01 | NC                     |
| 28302235  | Pif1, 5'-to-3' DNA helicase homolog                                            | <i>Pif1</i>          | 2.3  | 1.42         | -       | 1.40         | -       | 1.16                   | -       | -                      |
| 74186554  | Nedd8                                                                          | <i>Nedd8</i>         | 25.0 | 1.42         | -       | 1.39         | -       | 1.20                   | -       | -                      |
| 82795783  | eukaryotic translation elongation factor 1 $\gamma$ , eEF-1 $\gamma$           | <i>Eef1g</i>         | 2.6  | 1.39         | 6.3E-01 | 1.40         | 5.3E-01 | 0.87                   | 8.8E-02 | -                      |
| 148685426 | Tu translation elongation factor, mitochondrial                                | <i>Tufm</i>          | 8.3  | 1.39         | 8.1E-02 | 1.38         | 5.1E-02 | 1.07                   | 7.1E-01 | NC                     |
| 158937312 | heat shock protein 1                                                           | <i>Hspb1</i>         | 48.8 | 1.37         | 2.6E-02 | 1.30         | 1.2E-02 | 0.72                   | 3.8E-03 | -                      |
| 74177941  | Hsc70 interacting protein, suppression of tumorigenicity 13                    | <i>Stt13</i>         | 3.2  | 1.36         | 6.9E-02 | 1.28         | 4.9E-02 | 0.86                   | 1.4E-01 | -                      |
| 2950347   | myomesin 2, M-protein                                                          | <i>Myom2</i>         | 6.7  | 1.36         | 9.1E-04 | 1.17         | 6.9E-02 | 1.11                   | 3.7E-01 | -                      |
| 12833697  | tropomyosin 2                                                                  | <i>Tpm2</i>          | 64.1 | 1.32         | 1.2E-01 | 1.10         | 2.2E-01 | 0.95                   | 7.0E-01 | NC                     |
| 8392959   | UDP-Gal: $\beta$ GlcNAc $\beta$ -1,4- galactosyltransferase, polypeptide 2     | <i>B4gal2</i>        | 2.4  | 1.31         | -       | 1.16         | -       | 0.87                   | -       | NC                     |
| 21304450  | immunoglobulin gamma1 heavy chain                                              | <i>Ighg1</i>         | 5.0  | 1.31         | 2.2E-01 | 2.66         | 6.8E-02 | 0.97                   | 8.6E-01 | -                      |
| 74187552  | 14-3-3 $\zeta$                                                                 | <i>Ywhaz</i>         | 5.7  | 1.30         | -       | 1.11         | -       | 1.14                   | -       | NC                     |
| 31542970  | cardiovascular heat shock protein                                              | <i>Hspb7</i>         | 7.7  | 1.30         | 8.0E-02 | 1.59         | 1.9E-02 | 0.76                   | 3.8E-02 | -                      |
| 74198008  | glucosamine (N-acetyl)-6-sulfatase                                             | <i>Gns</i>           | 1.3  | 1.30         | -       | 1.11         | -       | 0.96                   | -       | -                      |
| 6753530   | crystallin, $\alpha$ B                                                         | <i>Cryab</i>         | 48.6 | 1.29         | 6.8E-03 | 1.33         | 1.1E-03 | 0.76                   | 6.0E-04 | NC                     |
| 6753912   | ferritin heavy chain 1                                                         | <i>Fth1</i>          | 8.2  | 1.29         | -       | 1.61         | -       | 1.13                   | -       | NC                     |
| 74223108  | dihydrolipoamide dehydrogenase, pyruvate dehydrogenase component E3            | <i>Dld</i>           | 13.6 | 1.29         | 1.8E-02 | 1.36         | 3.1E-02 | 1.10                   | 1.4E-01 | NC                     |
| 74224118  | radixin isoform a                                                              | <i>Rdx</i>           | 6.8  | 1.28         | 2.1E-01 | 1.28         | 1.7E-01 | 1.07                   | 4.6E-01 | NC                     |
| 74184730  | latrophilin 1                                                                  | <i>Lphn1</i>         | 0.6  | 1.28         | -       | 1.09         | -       | 1.00                   | -       | -                      |
| 59958370  | heat shock protein, $\alpha$ -crystallin-related, B6                           | <i>Hspb6</i>         | 14.2 | 1.27         | 4.2E-02 | 1.23         | 1.5E-02 | 0.91                   | 8.1E-02 | -                      |
| 148685498 | aldolase A, fructose-bisphosphate                                              | <i>Aldoa</i>         | 81.3 | 1.24         | 1.4E-03 | 1.11         | 3.3E-02 | 0.90                   | 1.4E-02 | NC                     |
| 6754724   | proteasome 26S subunit, non-ATPase, 7                                          | <i>PsmD7</i>         | 6.2  | 1.24         | 7.9E-01 | 1.55         | 2.1E-01 | 0.85                   | 7.6E-01 | -                      |
| 26348052  | nucleolar protein 3 (apoptosis repressor with CARD domain)                     | <i>NOL3</i>          | 8.6  | 1.23         | 7.0E-01 | 0.94         | 9.1E-01 | 0.87                   | 6.8E-01 | -                      |
| 148704795 | cofilin 2, muscle                                                              | <i>Cfl2</i>          | 64.0 | 1.23         | 3.8E-02 | 1.14         | 1.3E-01 | 1.06                   | 1.8E-01 | NC                     |
| 6678391   | troponin I, skeletal, fast 2                                                   | <i>Tnni2</i>         | 55.5 | 1.22         | 1.4E-01 | 0.98         | 7.8E-01 | 0.83                   | 3.0E-04 | NC                     |
| 74147564  | nicotinamide phosphoribosyltransferase                                         | <i>Nampt</i>         | 1.6  | 1.21         | 5.1E-01 | 1.05         | 7.8E-01 | 0.82                   | 3.5E-02 | -                      |
| 2340058   | troponin T                                                                     | <i>Tnnt3</i>         | 29.2 | 1.20         | 2.8E-03 | 1.09         | 4.7E-02 | 0.90                   | 3.0E-03 | NC                     |
| 49864     | $\alpha$ -actin                                                                | <i>Acta1</i>         | 67.3 | 1.20         | 2.3E-04 | 0.98         | 6.1E-01 | 1.03                   | 3.9E-01 | NC                     |
| 9910130   | ankyrin repeat domain 2, ANKRD2, MARP2                                         | <i>AnkrD2</i>        | 4.57 | 1.18         | -       | 1.15         | -       | 0.73                   | -       | -                      |
| 70778976  | phosphoglycerate kinase 1                                                      | <i>Pgk1</i>          | 78.2 | 1.16         | 1.3E-03 | 1.06         | 5.7E-02 | 1.01                   | 8.7E-01 | NC                     |
| 109081395 | tropomyosin 1 $\alpha$ chain                                                   | <i>Tpm1</i>          | 80.3 | 1.14         | 6.9E-03 | 1.05         | 4.3E-01 | 0.92                   | 2.3E-01 | NC                     |
| 124249109 | AT rich interactive domain 1A                                                  | <i>Arid1a</i>        | 0.7  | 1.12         | 4.5E-02 | 1.16         | 1.1E-01 | 1.12                   | 3.9E-01 | -                      |
| 156257677 | $\beta$ -globin                                                                | <i>Hbb-b1</i>        | 44.9 | 1.12         | 1.9E-02 | 0.97         | 2.9E-01 | 0.89                   | 1.2E-07 | 0.45                   |
| 31982861  | carbonic anhydrase 3                                                           | <i>Car3</i>          | 59.2 | 0.90         | 1.1E-02 | 1.01         | 7.4E-01 | 1.26                   | 1.7E-16 | -                      |
| 148675904 | malate dehydrogenase 1, NAD (soluble)                                          | <i>Mdh1</i>          | 36.9 | 0.89         | 3.5E-02 | 0.93         | 1.1E-01 | 1.00                   | 8.9E-01 | NC                     |
| 29789016  | fast skeletal myosin alkali light chain 1 isoform 1f                           | <i>My1f</i>          | 49.5 | 0.89         | 7.8E-03 | 0.80         | 9.0E-05 | 0.82                   | 4.0E-05 | NC                     |
| 74205957  | glycerol-3-phosphate dehydrogenase 1                                           | <i>Gpd1</i>          | 25.8 | 0.89         | 3.8E-02 | 0.92         | 1.8E-01 | 1.05                   | 2.3E-01 | NC                     |
| 10092608  | glutathione S-transferase, $\pi$ 1                                             | <i>Gstp1</i>         | 31.4 | 0.87         | 7.6E-03 | 1.00         | 9.6E-01 | 1.14                   | 9.2E-02 | NC                     |
| 74150922  | fumarate hydratase, mitochondrial                                              | <i>Fh1</i>           | 10.5 | 0.83         | 3.4E-01 | 0.87         | 3.3E-01 | 0.97                   | 5.5E-01 | -                      |
| 6753290   | calsequestrin 1                                                                | <i>Casq1</i>         | 14.0 | 0.83         | 3.4E-04 | 0.90         | 1.4E-02 | 1.28                   | 1.2E-07 | 0.85                   |
| 59798456  | uncharacterized protein KIAA0256                                               | <i>3110001120Rik</i> | 0.8  | 0.83         | -       | 0.88         | -       | 1.17                   | -       | -                      |
| 148679891 | peroxiredoxin 1                                                                | <i>Prdx1</i>         | 19.6 | 0.83         | 3.5E-02 | 1.14         | 9.2E-02 | 0.97                   | 3.8E-01 | NC                     |
| 74212250  | lactate dehydrogenase A                                                        | <i>Ldha</i>          | 53.0 | 0.83         | 6.9E-05 | 1.09         | 8.6E-01 | 1.02                   | 2.7E-01 | NC                     |
| 7949078   | myosin regulatory light chain 2, fast skeletal muscle                          | <i>My1pf</i>         | 13.6 | 0.82         | 2.5E-02 | 0.82         | 7.3E-02 | 0.97                   | 7.0E-01 | NC                     |
| 27659728  | aldo-keto reductase family 7, member A5                                        | <i>Akr7a5</i>        | 8.4  | 0.81         | 2.1E-01 | 0.94         | 7.7E-01 | 1.09                   | 5.2E-01 | -                      |
| 74137565  | albumin                                                                        | <i>Alb</i>           | 55.8 | 0.81         | 3.7E-16 | 1.05         | 2.3E-02 | 1.05                   | 5.8E-04 | NC                     |
| 148669989 | glutathione S-transferase M1                                                   | <i>Gstm1</i>         | 13.7 | 0.81         | 3.9E-02 | 0.92         | 3.7E-01 | 0.94                   | 4.4E-01 | -                      |
| 31982522  | acyl-Coenzyme A dehydrogenase, short chain                                     | <i>Acads</i>         | 8.3  | 0.80         | 1.6E-02 | 0.83         | 1.7E-01 | 1.01                   | 3.9E-01 | -                      |
| 9963904   | profilin 2                                                                     | <i>Pfn2</i>          | 17.9 | 0.77         | 2.8E-02 | 0.89         | 1.8E-01 | 1.11                   | 1.6E-01 | -                      |
| 6679937   | glyceraldehyde-3-phosphate dehydrogenase                                       | <i>Gapdh</i>         | 71.8 | 0.76         | 1.9E-17 | 1.06         | 8.2E-01 | 0.98                   | 1.5E-01 | NC                     |
| 74144566  | DnaJ (Hsp40) homolog, subfamily B, member 14 isoform 8                         | <i>Dnajb14</i>       | 5.1  | 0.74         | 2.8E-07 | 0.77         | 9.4E-08 | 1.01                   | 6.2E-02 | -                      |
| 146345417 | electron transfer flavoprotein subunit $\alpha$ , mitochondrial; $\alpha$ -ETF | <i>EtfA</i>          | 20.7 | 0.74         | 4.0E-03 | 0.89         | 2.3E-01 | 1.01                   | 8.8E-01 | -                      |
| 6680690   | peroxiredoxin 3                                                                | <i>Prdx3</i>         | 5.4  | 0.73         | -       | 0.88         | -       | 0.98                   | -       | -                      |
| 84794552  | phosphatidylethanolamine binding protein 1, Raf kinase inhibitor protein       | <i>Pebp1</i>         | 46.5 | 0.70         | 6.7E-03 | 0.82         | 1.2E-02 | 1.00                   | 9.6E-01 | NC                     |
| 31980767  | parvalbumin                                                                    | <i>Pvalb</i>         | 88.2 | 0.69         | 3.6E-12 | 0.79         | 3.5E-07 | 0.99                   | 7.0E-01 | NC                     |
| 21359820  | myoglobin                                                                      | <i>Mb</i>            | 85.7 | 0.64         | 2.6E-27 | 0.78         | 9.3E-19 | 0.92                   | 4.7E-03 | NC                     |
| 13385680  | 2,4-dienoyl CoA reductase 1, mitochondrial                                     | <i>Decri1</i>        | 4.5  | 0.59         | 9.6E-02 | 0.66         | 6.8E-02 | 0.92                   | 1.1E-02 | -                      |
| 50510361  | peroxiredoxin 6                                                                | <i>Prdx6</i>         | 8.4  | 0.40         | -       | 0.59         | -       | 1.22                   | -       | NC                     |

### **Supplemental Figure S10. Proteins with significantly different expression in the cytosol of WT and p94KI skeletal muscles.**

Relative protein expression amounts of WT, WT-ex, p94KI, and p94KI-ex mice were analyzed by iTRAQ<sup>TM</sup>-labeling, 2D-LC-MALDI-TOF/TOF, and ProteinPilot<sup>TM</sup> software. Proteins that have %Cov of non zero value and show p94KI/WT of WT/p94KI>1.1 are listed here in order of the p94KI/WT value (%Cov means % of amino acid residues (aar) included in the identified peptides with a confidence level of more than 95 against total aar of the protein). Ratios of greater than 1.1, greater than 1.2, less than 1/1.1 (0.91), and less than 1/1.2 (0.83) are marked by red, orange, pale blue, and blue colors, respectively. *P*-values were calculated by the ProteinPilot<sup>TM</sup> program for proteins that are identified by more than one peptide; otherwise, they are shown by "-". *P*-values less than 0.05 are colored yellow. For proteins that had no *P*-value due to single MS/MS identification or a *P*-value of more than 0.05, MS/MS spectra were manually examined and verified, and are listed only if the MS/MS spectra were clear enough to represent a change in ratios. mRNA expression profiles are shown for genes on the DNA microarray (see Supplemental Table S1); NC, not significantly changed; -, not included in the microarray chip used.

Note that hexokinase 2, one of the rate-limiting enzymes for glycolysis, and factors involved in protein translation (EF-Tu and eEF-1 $\gamma$ ), and proteasome subunits (PSMA4 and PSMD7) were upregulated in p94KI and WT-ex compared with WT (category **b** in Table 1). Members of this group may contribute to turnover of muscle cells by providing ATP, and producing and destructing proteins. Also, Ubch7, Nedd8, RSK-1 and S36mt, which are involved in protein degradation and translation systems, are also upregulated in WT-ex and p94KI (compared with WT) and p94KI-ex (compared with p94KI) (category **a** in Table 1). On the other hand, calsequestrin 1 (CASQ1), parvalbumin and myosin regulatory light chain 2, which binds Ca<sup>2+</sup>, are all downregulated in p94KI and WT-ex compared with WT (category **d** in Table 1).

Troponin I2 (TNNI2) and nicotinamide phosphoribosyltransferase (NAMPT) were upregulated in p94KI (compared with WT), but downregulated in p94KI-ex (compared with p94KI), whereas WT-ex showed no difference from WT. Conversely, programmed cell death protein 11 (PDCD11 or ALG-4) and carbonic anhydrase 3 (CAR3) were downregulated in p94KI (compared with WT), but upregulated in p94KI-ex (compared with p94KI), whereas WT-ex showed no difference from WT. These proteins may correspond to those perturbed upon exercise without p94 protease activity, but are modulated to be unchanged during exercise in WT mice.
